# Supplementary material
Source: PubMed Central journal article supplement (PMC549489)
Supplement: pnas_102_8_2832__1.pdf [file pnas_102_8_2832__1.pdf]

## Appendix 1. PAML summary results for TRIM5 $\alpha$

### A. PAML (1) Analysis of Entire Data Set (hominids+OWM+NWM)

#### 1. Log Likelihood Scores and Parameter Estimates for Four Models of Variable $\omega$ 's Among Sites Assuming the F3x4 Model of Codon Frequencies.

| Model              | Parameter Estimates                                                                                                                                                          | Sites* with $\omega > 1$                                                                                                                                                                                                                                                                                                                                                             | $\ell$    |
|--------------------|------------------------------------------------------------------------------------------------------------------------------------------------------------------------------|--------------------------------------------------------------------------------------------------------------------------------------------------------------------------------------------------------------------------------------------------------------------------------------------------------------------------------------------------------------------------------------|-----------|
| M0: one ratio      | Average dN/dS for each branch = 1.160<br>S = 1.55260                                                                                                                         |                                                                                                                                                                                                                                                                                                                                                                                      | -5772.38  |
| <b>Site models</b> |                                                                                                                                                                              |                                                                                                                                                                                                                                                                                                                                                                                      |           |
| M1: neutral        | $(\omega_0 = 0), f_0 = 0.354$<br>$(\omega_1 = 1) (f_1 = 0.646)$                                                                                                              | Not allowed                                                                                                                                                                                                                                                                                                                                                                          | -5,725.00 |
|                    | Average dN/dS for each branch = 0.646<br>S = 1.56259                                                                                                                         |                                                                                                                                                                                                                                                                                                                                                                                      |           |
| M2: selection      | $(\omega_0 = 0), f_0 = 0.281$<br>$(\omega_1 = 1), f_1 = 0.566$<br><b><math>\omega_2 = 4.624 (f_2 = 0.153)</math></b><br>Average dN/dS for each branch = 1.273<br>S = 1.62074 | <b>(47–51: gaps)</b><br>175 Q 0.9958**<br>213 S 0.9635*<br>215 T 0.9955**<br>228 L 0.9942**<br>310 C 0.9924**<br>311 A 0.9603*<br>317 K 0.9757*<br>324 K 0.9995**<br>325 P 0.9933**<br><b>(326–338: gaps)</b><br>339 F 0.9994**<br>340 V 0.9999**<br><b>(385–386: gaps)</b><br>389 K 0.9953**<br>407 G 0.9974**<br>418 F 0.9997**<br>421 P 0.9769*<br>423 V 0.9633*<br>471 Q 0.9535* | -5,667.01 |

| Model                    | Parameter Estimates                                                                                                                                                      | Sites* with $\omega > 1$                                                                                                                                                                                                                                                                                                                                                                                                                | $\ell$    |
|--------------------------|--------------------------------------------------------------------------------------------------------------------------------------------------------------------------|-----------------------------------------------------------------------------------------------------------------------------------------------------------------------------------------------------------------------------------------------------------------------------------------------------------------------------------------------------------------------------------------------------------------------------------------|-----------|
|                          |                                                                                                                                                                          | 483 G 0.9936**                                                                                                                                                                                                                                                                                                                                                                                                                          |           |
| M3:discrete              | $\omega_0 = 0.342$ $f_0 = 0.662$<br>$\omega_1 = 2.575$ ( $f_1 = 0.305$ )<br>$\omega_2 = 7.922$ ( $f_2 = 0.033$ )<br>Average dN/dS for each branch = 1.273<br>S = 1.63377 | Too many to list.<br>Note: M3 vs. M0 is a test of heterogeneity among sites and not an explicit test of positive selection.                                                                                                                                                                                                                                                                                                             | -5,664.25 |
| M7: $\beta$              | $p = 0.02830$ $q = 0.01638$<br>Average dN/dS for each branch = 0.6160<br>S = 1.55777                                                                                     | Not allowed                                                                                                                                                                                                                                                                                                                                                                                                                             | -5,724.62 |
| M8: $\beta$ and $\omega$ | $p = 0.2299$ $q = 0.14801$<br>$f_0 = 0.829$<br>$\omega_1 = 4.308$ ( $f_1 = 0.171$ )<br>Average dN/dS for each branch = 1.2426<br>S = 1.62038                             | <b>(47-51: gaps)</b><br>139 Q 0.9534*<br>175 Q 0.9967**<br>213 S 0.9739*<br>215 T 0.9966**<br>228 L 0.9958**<br>257 T 0.9511*<br>310 C 0.9943**<br>311 A 0.9717*<br>317 K 0.9830*<br>324 K 0.9996**<br>325 P 0.9946**<br><b>(326-338: gaps)</b><br>339 F 0.9995**<br>340 V 0.9999**<br>384 D 0.9539*<br><b>(385-386: gaps)</b><br>389 K 0.9964**<br>390 N 0.9611*<br>407 G 0.9979**<br>418 F 0.9998**<br>421 P 0.9830*<br>423 V 0.9737* | -5,666.71 |

| Model | Parameter Estimates | Sites* with $\omega > 1$        | $\ell$ |
|-------|---------------------|---------------------------------|--------|
|       |                     | 471 Q 0.9670*<br>483 G 0.9952** |        |

$p$  and  $q$  are parameters of the  $\beta$  distribution.  $f$  is the proportion of sites assigned to an individual  $\omega$  ( $= dN/dS$ ) category or to a  $\beta$  distribution with shape parameters  $p$  and  $q$ . The proportion  $f_{1,2}$  in parentheses is not a free parameter. Sites assigned to  $\omega_{1,2}$  are those with posterior probabilities ( $P$ )  $> 0.95$ , and those with  $P > 0.99$  are in bold. Analyses were conducted using  $\kappa$  as a free parameter.  $S$  = tree length.

\*Sites assigned to  $\omega > 1$  are those with posterior probabilities  $P > 0.95$  (\*) or  $P > 0.99$  (\*\*).

## 2. Log Likelihood Scores and Parameter Estimates for Four Models of Variable $\omega$ 's Among Sites Assuming the F61 Model of Codon Frequencies.

| Model              | Parameter estimates                                                                                                                                                         | Sites* with $\omega > 1$                                                                                                                                                            | $\ell$    |
|--------------------|-----------------------------------------------------------------------------------------------------------------------------------------------------------------------------|-------------------------------------------------------------------------------------------------------------------------------------------------------------------------------------|-----------|
| M0: one ratio      | Average dN/dS for each branch = 1.144<br>S = 1.55005                                                                                                                        |                                                                                                                                                                                     | -5,748.06 |
| <b>Site models</b> |                                                                                                                                                                             |                                                                                                                                                                                     |           |
| M1: neutral        | $(\omega_0 = 0) f_0 = 0.359$<br>$(\omega_1 = 1) (f_1 = 0.641)$                                                                                                              | Not allowed                                                                                                                                                                         | -5,696.78 |
|                    | Average dN/dS for each branch = 0.641<br>S = 1.56922                                                                                                                        |                                                                                                                                                                                     |           |
| M2: selection      | $(\omega_0 = 0) f_0 = 0.291$<br>$(\omega_1 = 1) f_1 = 0.551$<br><b><math>\omega_2 = 4.451 (f_2 = 0.158)</math></b><br>Average dN/dS for each branch = 1.2545<br>S = 1.62398 | <b>(47-51: gaps)</b><br>175 Q 0.9954**<br>213 S 0.9544*<br>215 T 0.9970**<br>228 L 0.9957**<br>310 C 0.9930**<br>311 A 0.9669*<br>317 K 0.9736*<br>324 K 0.9994**<br>325 P 0.9903** | -5,641.84 |

| Model                    | Parameter estimates                                                                                                                                                       | Sites* with $\omega > 1$                                                                                                                                                                                                                                                                                      | $\ell$    |
|--------------------------|---------------------------------------------------------------------------------------------------------------------------------------------------------------------------|---------------------------------------------------------------------------------------------------------------------------------------------------------------------------------------------------------------------------------------------------------------------------------------------------------------|-----------|
|                          |                                                                                                                                                                           | <b>(326-338: gaps)</b><br>339 F 0.9987**<br>340 V 0.9999**<br><b>(385-386: gaps)</b><br>389 K 0.9935**<br>407 G 0.9958**<br>411 S 0.9536*<br>418 F 0.9994**<br>421 P 0.9784*<br>423 V 0.9680*<br>483 G 0.9909**                                                                                               |           |
| M3:discrete              | $\omega_0 = 0.301$ $f_0 = 0.631$<br>$\omega_1 = 2.379$ ( $f_1 = 0.328$ )<br>$\omega_2 = 7.224$ ( $f_2 = 0.041$ )<br>Average dN/dS for each branch = 1.2692<br>S = 1.63693 | Too many to list.<br>Note: M3 vs. M0 is a test of heterogeneity among sites and not an explicit test of positive selection.                                                                                                                                                                                   | -5,639.09 |
| M7: $\beta$              | $p = 0.029$ $q = 0.0167$<br>Average dN/dS for each branch = 0.6144<br>S = 1.56601                                                                                         | Not allowed                                                                                                                                                                                                                                                                                                   | -5,696.39 |
| M8: $\beta$ and $\omega$ | $p = 0.16877$ $q = 0.11056$<br>$f_0 = 0.825$<br>$\omega_1 = 4.190$ ( $f_1 = 0.175$ )<br>Average dN/dS for each branch = 1.2331<br>S = 1.62300                             | <b>(47-51: gaps)</b><br>139 Q 0.9532*<br>175 Q 0.9963**<br>213 S 0.9659*<br>215 T 0.9975**<br>228 L 0.9967**<br>257 T 0.9607*<br>310 C 0.9945**<br>311 A 0.9749*<br>317 K 0.9805*<br>324 K 0.9995**<br>325 P 0.9920**<br><b>(326-338: gaps)</b><br>339 F 0.9989**<br>340 V 0.9999**<br><b>(385-386: gaps)</b> | -5,641.64 |

| Model | Parameter estimates | Sites* with $\omega > 1$                                                                                                                                  | $\ell$ |
|-------|---------------------|-----------------------------------------------------------------------------------------------------------------------------------------------------------|--------|
|       |                     | 389 K 0.9949**<br>390 N 0.9587*<br>407 G 0.9966**<br>411 S 0.9653*<br>418 F 0.9995**<br>421 P 0.9832*<br>423 V 0.9756*<br>471 Q 0.9570*<br>483 G 0.9929** |        |

$p$  and  $q$  are parameters of the  $\beta$  distribution.  $f$  is the proportion of sites assigned to an individual  $\omega$  (= dN/dS) category or to a  $\beta$  distribution with shape parameters  $p$  and  $q$ . The proportion  $f_{1,2}$  in parentheses is not a free parameter. Sites assigned to  $\omega_{1,2}$  are those with posterior probabilities  $P > 0.95$ ; those with  $P > 0.99$  are in bold. Analyses were conducted by using  $\kappa$  as a free parameter. S = tree length.

\*Sites assigned to  $\omega > 1$  are those with posterior probabilities  $P > 0.95$  (\*) or  $P > 0.99$  (\*\*).

### 3. Likelihood Ratio Test Statistics ( $2\delta$ ) for Models of Variable Selective Pressure Among Sites.

|                                            | $2\delta$ | df | $P$ value    |
|--------------------------------------------|-----------|----|--------------|
| Model 0 (one dN/dS ratio for all branches) |           |    |              |
| <b>F3x4</b>                                |           |    |              |
| One ratio vs. M3 ( $k = 3$ )               | 216.26    | 4  | $P < 0.0001$ |
| M1 vs. M2                                  | 115.98    | 2  | $P < 0.0001$ |
| M7 vs. M8                                  | 115.82    | 2  | $P < 0.0001$ |
| <b>F61</b>                                 |           |    |              |
| One ratio vs. M3 ( $k = 3$ )               | 217.94    | 4  | $P < 0.0001$ |
| M1 vs. M2                                  | 109.88    | 2  | $P < 0.0001$ |
| M7 vs. M8                                  | 109.50    | 2  | $P < 0.0001$ |

#### 4. Likelihood Ratio Test Statistics ( $2\delta$ ) for Models of Variable Selective Pressure Along Branches.

|                                                 | $\ell$     | $2\delta$ | df* | <i>P</i> value    |
|-------------------------------------------------|------------|-----------|-----|-------------------|
| TRIM5                                           |            |           |     |                   |
| Model 0 (same dN/dS ratio for all branches)     | -5,784.326 |           |     |                   |
| Model 1 (different dN/dS ratio for each branch) | -5,755.534 | 57.584    | 37  | $P < 0.02$        |
| <b>Apobec3G<sup>†</sup></b>                     |            |           |     |                   |
| Model 0 (same dN/dS ratio for all branches)     | -4,209.048 |           |     |                   |
| Model 1 (different dN/dS ratio for each branch) | -4,201.337 | 15.422    | 20  | $P > 0.75$ (N.S.) |

\*df denotes degrees of freedom that is equal to one less than the total number of branches in the phylogeny. For a 20-taxa tree like in TRIM5, the total number of branches is 38, so df = 37. N.S., not significant.

<sup>†</sup>Sawyer, S. L., Emerman, M. & Malik, H. S. (2004) *PLoS Biol.* **2**, e275.

#### 5. Likelihood Ratio Test Statistics for Models of Selection Along the Human and Gibbon Lineages (OWM + hominids only).

|                                                                      | $\omega$ (dN/dS)<br>(human or<br>gibbon<br>branch) | $\omega$ (dN/dS)<br>(remainder<br>of tree) | $\ell$     | $2\delta$ | df* | <i>P</i> value |
|----------------------------------------------------------------------|----------------------------------------------------|--------------------------------------------|------------|-----------|-----|----------------|
| Human                                                                |                                                    |                                            |            |           |     |                |
| Model 0 (two-ratio, human $\omega = 1$ )                             | 1.00                                               | 1.132                                      | -5,748.233 |           |     |                |
| Model 1 [two-ratio, human $\omega > 1$ (estimated by PAML; ref. 1)]  | 2.985                                              | 1.133                                      | -5,747.543 | 1.38      | 1   | 0.24 (N.S)     |
| <b>Gibbon</b>                                                        |                                                    |                                            |            |           |     |                |
| Model 0 (two-ratio, gibbon $\omega = 1$ )                            | 1.00                                               | 1.087                                      | -5,748.718 |           |     |                |
| Model 1 [two-ratio, gibbon $\omega > 1$ (estimated by PAML; ref. 1)] | 5.594                                              | 1.091                                      | -5,744.345 | 8.746     | 1   | 0.0031         |

df denotes degrees of freedom; here,  $df = 1$ .

## 6. P Value Statistics for Positive Selection Along the Human and Gibbon Lineages, Based on Monte Carlo Simulation.

|                           | Confidence ancestral sequence (0-1) per site | $\omega$ (dN/dS) | P value       |
|---------------------------|----------------------------------------------|------------------|---------------|
| Human vs. Ancestral Node  | 0.99971                                      | 3.6              | $P < 10^{-4}$ |
| Gibbon vs. Ancestral Node | 0.99633                                      | 6.5              | $P < 10^{-4}$ |

### B. PAML (1) Analysis of Partial Data Set (hominids+OWM)

#### 1. Log Likelihood Scores and Parameter Estimates for Four Models of Variable $\omega$ 's Among Sites Assuming the F3x4 Model of Codon Frequencies.

| Model              | Parameter estimates                                                                                                                                                                   | Sites* with $\omega > 1$                                                                                                    | $\ell$            |
|--------------------|---------------------------------------------------------------------------------------------------------------------------------------------------------------------------------------|-----------------------------------------------------------------------------------------------------------------------------|-------------------|
| M0: one ratio      | Average dN/dS for each branch = 1.1923                                                                                                                                                |                                                                                                                             | <b>-3,519.244</b> |
| <b>Site models</b> |                                                                                                                                                                                       |                                                                                                                             |                   |
| M1: neutral        | $(\omega_0 = 0) f_0 = 0.307$                                                                                                                                                          | Not allowed                                                                                                                 | <b>-3,513.813</b> |
|                    | $(\omega_1 = 1) (f_1 = 0.693)$                                                                                                                                                        |                                                                                                                             |                   |
|                    | Average dN/dS for each branch = 0.693                                                                                                                                                 |                                                                                                                             |                   |
| M2: selection      | $(\omega_0 = 0) f_0 = 0.185$<br>$(\omega_1 = 1) f_1 = 0.783$<br><b><math>\omega_2 = 11.283 (f_2 = 0.032)</math></b><br>Average dN/dS for each branch = 1.1429                         | <b>330 G 0.9960**</b><br><b>332 R 0.9929**</b><br><b>335 R 0.9890*</b><br><b>337 Q 0.9981**</b><br><b>340 V 0.9993**</b>    | <b>-3,492.320</b> |
| M3:discrete        | $\omega_0 0.00001 f_0 = 0.380$<br><b><math>\omega_1 = 1.667 (f_1 = 0.601)</math></b><br><b><math>\omega_2 = 16.866 (f_2 = 0.019)</math></b><br>average dN/dS for each branch = 1.3219 | Too many to list.<br>Note: M3 vs. M0 is a test of heterogeneity among sites and not an explicit test of positive selection. | <b>-3,490.526</b> |
| M7: $\beta$        | $p = 0.00592 q = 0.00273$<br>Average dN/dS for each branch = 0.7                                                                                                                      | Not allowed                                                                                                                 | <b>-3,513.818</b> |

| Model                    | Parameter estimates                                                                                                             | Sites* with $\omega > 1$                                                                                                 | $\ell$     |
|--------------------------|---------------------------------------------------------------------------------------------------------------------------------|--------------------------------------------------------------------------------------------------------------------------|------------|
| M8: $\beta$ and $\omega$ | $p = 0.01037$ $q = 0.00248$<br>$f_0 = 0.968$<br>$\omega_1 = 11.191$ ( $f_1 = 0.032$ )<br>Average dN/dS for each branch = 1.1308 | <b>330 G 0.9959**</b><br><b>332 R 0.9927**</b><br><b>335 R 0.9888*</b><br><b>337 Q 0.9980**</b><br><b>340 V 0.9992**</b> | -3,492.324 |

$p$  and  $q$  are parameters of the  $\beta$  distribution.  $f$  is the proportion of sites assigned to an individual  $\omega$  (= dN/dS) category or to a  $\beta$  distribution with shape parameters  $p$  and  $q$ . The proportion  $f_{1,2}$  in parentheses is not a free parameter. Sites assigned to  $\omega_{1,2}$  are those with posterior probabilities  $P > 0.95$ ; those with  $P > 0.99$  are in bold. Analyses were conducted using  $\kappa$  as a free parameter. S = tree length.

\*Sites assigned to  $\omega > 1$  are those with posterior probabilities  $P > 0.95$  (\*) or  $P > 0.99$  (\*\*).

## 2. Log Likelihood Scores and Parameter Estimates for Four Models of Variable $\omega$ 's Among Sites Assuming the F61 Model of Codon Frequencies

| Model              | Parameter estimates                                                                                                                             | Sites* with $\omega > 1$                                                                                                                        | $\ell$     |
|--------------------|-------------------------------------------------------------------------------------------------------------------------------------------------|-------------------------------------------------------------------------------------------------------------------------------------------------|------------|
| M0: one ratio      | Average dN/dS for each branch = 1.1375                                                                                                          |                                                                                                                                                 | -3,469.858 |
| <b>Site models</b> |                                                                                                                                                 |                                                                                                                                                 |            |
| M1: neutral        | $(\omega_0 = 0) f_0 = 0.331$<br>$(\omega_1 = 1) (f_1 = 0.669)$<br>Average dN/dS for each branch = 0.669                                         | Not allowed                                                                                                                                     | -3,462.818 |
| M2: selection      | $(\omega_0 = 0) f_0 = 0.215$<br>$(\omega_1 = 1) f_1 = 0.749$<br>$\omega_2 = 10.019$ ( $f_2 = 0.036$ )<br>Average dN/dS for each branch = 1.1057 | <b>330 G 0.9914**</b><br><b>332 R 0.9934**</b><br><b>335 R 0.9840*</b><br><b>337 Q 0.9984**</b><br><b>338 T 0.6807</b><br><b>340 V 0.9993**</b> | -3,443.237 |
| M3: discrete       | $\omega_0 = 0.00001$ $f_0 = 0.415$<br>$\omega_1 = 1.761$ ( $f_1 = 0.568$ )                                                                      | Too many to list.<br>Note: M3 vs. M0 is a test                                                                                                  | -3,441.147 |



| Model                    | Parameter estimates                                                                                                                | Sites* with $\omega > 1$                                                                                                 | $\ell$     |
|--------------------------|------------------------------------------------------------------------------------------------------------------------------------|--------------------------------------------------------------------------------------------------------------------------|------------|
|                          | $\omega_2 = 17.069$ ( $f_2 = 0.017$ )<br>Average dN/dS for each branch =<br>1.2835                                                 | of heterogeneity among sites and not an explicit test of positive selection.                                             |            |
| M7: $\beta$              | $p = 0.00484$ $q = 0.00310$                                                                                                        | Not allowed                                                                                                              | -3,463.372 |
|                          | Average dN/dS for each branch = 0.6                                                                                                |                                                                                                                          |            |
| M8: $\beta$ and $\omega$ | $p = 0.00553$ $q = 0.00144$<br>$f_0 = 0.964$<br>$\omega_1 = 10.263$ ( $f_1 = 0.036$ )<br>Average dN/dS for each branch =<br>1.2368 | <b>330 G 0.9919**</b><br><b>332 R 0.9938**</b><br><b>335 R 0.9849*</b><br><b>337 Q 0.9985**</b><br><b>340 V 0.9994**</b> | -3,443.266 |

$p$  and  $q$  are parameters of the  $\beta$  distribution.  $f$  is the proportion of sites assigned to an individual  $\omega$  (= dN/dS) category or to a  $\beta$  distribution with shape parameters  $p$  and  $q$ . The proportion  $f_{1,2}$  in parentheses is not a free parameter. Sites assigned to  $\omega_{1,2}$  are those with posterior probabilities  $P > 0.95$ ; those with  $P > 0.99$  are in bold. Analyses were conducted using  $\kappa$  as a free parameter. S = tree length.

\* Sites assigned to  $\omega > 1$  are those with posterior probabilities  $P > 0.95$  (\*) or  $P > 0.99$  (\*\*).

### 3. Likelihood Ratio Test Statistics (2 $\delta$ ) for Models of Variable Selective Pressure Among Sites.

|                                         | 2 $\delta$ | df | $P$ value    |
|-----------------------------------------|------------|----|--------------|
| Model 0 (one $\omega$ for all branches) |            |    |              |
| <b>F3x4</b>                             |            |    |              |
| One ratio vs. M3 ( $k = 3$ )            | 57.436     | 4  | $P < 0.0001$ |
| M1 vs. M2                               | 42.986     | 2  | $P < 0.0001$ |
| M7 vs. M8                               | 42.988     | 2  | $P < 0.0001$ |
| <b>F61</b>                              |            |    |              |
| One ratio vs. M3 ( $k = 3$ )            | 57.422     | 4  | $P < 0.0001$ |
| M1 vs. M2                               | 39.162     | 2  | $P < 0.0001$ |
| M7 vs. M8                               | 40.212     | 2  | $P < 0.0001$ |

1. Yang, Z. (1997) *Comput. Appl. Biosci.* **13**, 555–556.
