# Supplementary material
Source: PubMed Central journal article supplement (PMC549489)
Supplement: pnas_102_8_2832__2.pdf [file pnas_102_8_2832__2.pdf]

Human ATGGCTTCTGGAATCCTGGTTAATGTAAAGGAGGAGGTGACCTGCCCCATCTGCCTGGAA (20)  
 Chim ATGGCTTCTGGAATCCTGGTTAATGTAAAGGAGGAGGTGACCTGCCCCATCTGCCTGGAA  
 Gorilla ATGGCTTCTGGAATCCTGGTTAATGTAAAGGAGGAGGTGACCTGCCCCATCTGCCTGGAA  
 Orangutan ATGGCTTCTGGAATCCTGGTTAATGTAAAGGAGGAGGTGACCTGCCCCATCTGCCTGGAA  
 Gibbon ATGGCTTCTGGAATCCTGGTTAATGTAAAGGAGGAGGTGACCTGCCCCATCTGCCTGGAA  
 Rhes\_cDNA ATGGCTTCTGGAATCCTGCTTAATGTAAAGGAGGAGGTGACCTGTCCCATCTGCCTGGAA  
 Baboon ATGGCTTCTGGAATCCTGCTTAATGTAAAGGAGGAGGTGACCTGTCCCATCTGCCTGGAA  
 AGM ATGGCTTCTGGAATCCTGCTTAATGTAAAGGAGGAGGTGACCTGTCCCATCTGCCTGGAA  
 AGM\_cDNA ATGGCTTCTGGAATCCTGGTTAATGTAAAGGAGGAGGTGACCTGTCCCATCTGCCTGGAA  
 Tant\_cDNA ATGGCTTCTGGAATCCTGCTTAATGTAAAGGAGGAGGTGACCTGTCCCATCTGCCTGGAA  
 Patas ATGGCTTCTGGAATCCTGCTTAATGTAAAGGAGGAGGTGACCTGTCCATCTGCCTGGAA  
 Colobus ATGGCTTCTGGAATCCTGGTTAATATAAAGGAGGAGGTGACCTGCCCCATCTGCCTGGAA  
 DLangur ATGGCTTCTGGAATCCTGGTTAATATAAAGGAGGAGGTGACCTGCCCCATCTGCCTGGAA  
 PMarmoset ATGGCTTCCAGAATCCTGGTGAATATAAAGGAGGAGGTAACTGCCCCATCTGCCTGGAA  
 Tamarin ATGGCTTCCAGAATCCTGGTGAATATAAAGGAGGAGGTGACCTGCCCCATCTGCCTGGAA  
 Squirrel ATGGCTTCCAGAATCCTGGTGAATATAAAGGAGGAGGTGACCTGCCCCATCTGCCTGGAA  
 Owl ATGGCTTCCAGAATCCTGGTCAATATAAAGGAGGAGGTGACCTGCCCCATCTGCCTGGAA  
 Titi ATGGCTTCCAGAATCCTGGTGAATATAAAGGAGGAGGTGACCTGCCCCATCTGCCTGGAA  
 Saki ATGGCTTCCAGAATCCTGATGAACATAAAGGAGGAGGTGACCTGCCCCATCTGCCTGGAA  
 Howler ATGGCTTCCAAAATCCTGGTGAATATAAAGGAGGAGGTGACCTGCCCCATCTGCCTGGAA  
 Spider ATGGCTTCCGAAATCCTGTTGAATATAAAGGAGGAGGTGACCTGCCCCATCTGCCTGGAA  
 Woolly ATGGCTTCCGAAATCCTGGTGAATATAAAGGAGGAGGTGACCTGCCCCATCTGCCTGGAC

Human CTCCTGACACAACCCCTGAGCCTGGACTGCGGCCACAGCTTCTGCCAAGCATGCCTCACT (40)  
 Chim CTCCTGACACAACCCCTGAGCCTGGACTGCGGCCACAGCTTCTGCCAAGCATGCCTCACT  
 Gorilla CTCCTGACACAACCCCTGAGCCTGGACTGCGGCCACAGCTTCTGCCAAGCATGCCTCACT  
 Orangutan CTCCTGACACAACCCCTGAGTCTGGACTGCGGCCACAGCTTCTGCCAAGCATGCCTCACT  
 Gibbon CTCCTGACACAACCCCTGAGTCTGGACTGCGGCCACAGCTTCTGCCAAGCATGCCTCACT  
 Rhes\_cDNA CTCCTGACAGAACCCCTGAGTCTGCACTGCGGCCACAGCTTCTGCCAAGCGTGCATCACT  
 Baboon CTCCTGACAGAACCCCTGAGTCTGCCCTGTGGCCACAGCTTCTGCCAAGCGTGCATCACT  
 AGM CTCCTGACAGAACCCCTGAGTCTGCCCTGCGGCCACAGCTTCTGCCAAGCGTGCATCACT  
 AGM\_cDNA CTCCTGACAGAACCCCTGAGTCTGCCCTGCGGCCACAGCTTCTGCCAAGCGTGCATCACT  
 Tant\_cDNA CTCCTGACAGAACCCCTGAGTCTGCCCTGCGGCCACAGCTTCTGCCAAGCGTGCATCACT  
 Patas CTCCTGACAGAACCCCTGAGTCTGCCCTGCGGCCACAGCTTCTGCCAAGCGTGCATCACT  
 Colobus CTCCTGACAGAACCCCTGAGTCTGCACTGCGGCCACAGCTTCTGCCAAGCGTGCATCACT  
 DLangur CTCCTGACAGAACCCCTGAGTCTGCACTGCGGCCACAGCTTCTGCCAAGCGTGCATCACT  
 PMarmoset CTCCTGACAGAACCTCTGAGCCTAGACTGTGGCCACAGCTTCTGCCAAGCCTGCATCACT  
 Tamarin CTCCTGACAGAACCTCTGAGCCTAGACTGTGGCCACAGCTTCTGCCAAGCATGCATCACT  
 Squirrel CTCCTGACAGAACCTCTGAGCCTAGACTGTGGCCACAGCTTCTGCCAAGCATGCATCACT  
 Owl CTCCTGACAGAACCCCTGAGCCTGGACTGTGGCCATAGCTTCTGCCAAGCATGCATCACT  
 Titi CTCCTGACAGAACCCCTGAGCCTAGACTGTGGCCACAGCTTCTGCCAAGCATGCATCACC  
 Saki CTCCTGACAGAACCCCTGAGCCTAGACTGTGGCCACAGCTTCTGCCAAGCATGCATCACT  
 Howler CTACTGACAGAACCTCTGAGCCTAGACTGTGGCCACAGCTTCTGCCAAGCATGCATCACT  
 Spider CTACTGACAGAACCTCTGAGCCTAGACTGTGGCCACAGCTTCTGCCAAGCATGCATCACT  
 Woolly CTACTGACAGAACCTCTGAGCCTAGACTGTGGCCACAGCTTCTGCCAAGCATGCATCACT

Human GCAAACCACAAGAAGTCCATGCTAGACAAAGGA---GAGAGTAGCTGCCCTGTGTGCCGG ( 59 )  
Chimp GCAAACCACAAGAAGTCCATGCTAGACAAAGGA---GAGAGTAGCTGCCCTGTGTGCCGG  
Gorilla GCAAACCACAAGAAGTCCATGCTAGACAAAGGA---GAGAGTAGCTGCCCTGTGTGCCGG  
Orangutan GCAAACCACAAGAAGTCCACGCTAGACAAAGGA---GAGAGAAGCTGCCCTGTGTGCCGG  
Gibbon GCAAACCACAAAACGTCCATGCCAGACGAAGGA---GAGAGAAGCTGCCCTGTGTGCCGG  
Rhes\_cDNA GCGAACCACAAGAAGTCCATGCTATACAAAGAAGGAGAGAGAAGCTGCCCTGTGTGCCGG  
Baboon GCAAACCACAGGAAGTCCATGCTATACAAAGAAGGAGAGAGAAGCTGCCCTGTGTGCCGG  
AGM GCAAACCACAAGGAGTCCATGCTATACAAAGAAGAAGAGAGAAGCTGCCCTGTGTGCCGG  
AGM\_cDNA GCAAACCACAAGGAGTCCATGCTATACAAAGAAGAAGAGAGAAGCTGCCCTGTGTGCCGG  
Tant\_cDNA GCAAACCACAAGGAGTCCATGCTATACAAAGAAGAAAGAGAGAAGCTGCCCTGTGTGCCGG  
Patas GCAAACCACAAGAAGTCCATGCTATACAAAGAAGAAAGAGAGAAGCTGCCCTGTGTGCCGG  
Colobus GCAAACCACAAGAAGTCCATGCTATACAAAGAAGGAGAGAGAAGCTGCCCTGTGTGCCGG  
DLangur GCAAACCACAAGAAGTCCATGCTATACAAAGAAGGAGAGAGAAGCTGCCCTGTGTGCCGG  
PMarmoset GCAAACCACAAAAGAGTCTACGCCACACCAAGGA---GAGAGAAGCTGCCCTTTGTGCCGG  
Tamarin GCAAACCACAAAAGAGTCTACGCCACACCAAGGA---GAGAGAAGCTGCCCTTTGTGCCGG  
Squirrel GCAAATCACAAAAGAGTCTATGCTACACCAAGGA---GAGAGAAGCTGCCCTTTGTGCCGG  
Owl GCAAATCACAAAAAGTCTATGCCACACCAAGGA---GAGAGAAGCTGCCCTTTGTGCCGG  
Titi GCAAACCACAAAAGAGTCTACGCTACACCAAGGA---GAGAGAAGCTGCCCTTTGTGCCGG  
Saki GCAAACCACAAAAGAGTCTATGCTACACCAAGGA---GAGAGAAGCTGCCCTTTGTGCCGG  
Howler GCAAACCACAAAAGAGTCC-----AGA---GAGAGAAGCTGCCCTTTGTGCCGG  
Spider GCAAACCACAAAAGAGTCTACGCTACACCAAGGA---GAGAGAAGCTGCCCTTTGTGCCGG  
Woolly GCAGACCACAAAAGAGTCTACGCTACACCAAGGA---GAGAGAAGCTGCCCTTTGTGCCGG

Human ATCAGTTACCAGCCTGAGAACATACGGCCTAATCGGCATGTAGCCAACATAGTGGAGAAG ( 79 )  
Chimp ATCAGTTACCAGCCTGAGAACATACGGCCTAATCGGCATGTAGCCAACATAGTGGAGAAG  
Gorilla ATCAGTTACCAGCCTGAGAACATACGGCCTAATCGGCATGTAGCCAACATAGTGGAGAAG  
Orangutan GTCAGTTACCAGCCTAAGAACATACGGCCTAATCGGCATGTAGCCAACATAGTGGAGAAG  
Gibbon ATCAGTTACCAGCATAAGAACATACGGCCTAATCGGCATGTAGCCAACATAGTGGAGAAG  
Rhes\_cDNA ATCAGTTACCAGCCTGAGAACATACAGCCTAATCGGCATGTAGCCAACATAGTGGAGAAG  
Baboon ATCAGTTACCAGCCTGAGAACATACAGCCTAATCGGCATGTAGCCAACATAGTGGAGAAG  
AGM ATCAGTTACCAGCCTGAGAATATACAGCCTAATCGGCATGTAGCCAACATAGTGGAGAAG  
AGM\_cDNA ATCAGTTACCAGCCTGAGAATATACAGCCTAATCGGCATGTAGCCAACATAGTGGAGAAG  
Tant\_cDNA ATCAGTTACCAGCCTGAGAATATACAGCCTAATCGGCATGTAGCCAACATAGTGGAGAAG  
Patas ATCAGTTACCAGCCTGAGAACATACAGCCTAATCGGCATGTAGCCAACATAGTGGAGAAG  
Colobus ATCAGTTACCAGCCTGAGAACATACGGCCTAATCGGCATGTGGCCAACATAGTGGAGAAG  
DLangur ATCAGTTACCAGCCTGAGAACATACGGCCTAATCGGCATGTGGCCAACATAGTGGAGAAG  
PMarmoset ATGAGTTACCCGTCTGAGAACTTGCGGCCTAATCGGCATTTGGCCAATATAGTGGAGAGG  
Tamarin ATGAGTTACCCGTCTGAGAACTTGCGGCCTAATCGGCATTTGGCCAACATAGTGGAGAGG  
Squirrel CTCCCTTACCAGTCTGAGAACCTGCGGCCTAATCGGCATTTGGCCAGCATCGTGGAGAGG  
Owl ATCAGTTACTCGTCTGAGAACCTGCGGCCTAATCGGCATTTGGTCAACATAGTGGAGAGG  
Titi ATCAGTTACCCGTCTGAGAACCTGCGGCCTAATCGGCATTTGGCCAACATAGTGGAGAGG  
Saki ATCAGTTACCCATCTGAGAACCTGCGGCCTAATCGGCATTTGGCCAACATAGTGGAGAGG  
Howler GTCAGTTACCACTCTGAGAACCTGCGGCCTAATCGGCATTTGGCCAACATAGCGGAGAGG  
Spider GTCAGTTACCAGTCTGAGAACCTGCGGCCTAATCGGCATTTGGCAAACATAGCGGAGAGG  
Woolly GTCGGTTACCAGTCTGAGAACCTGCGGCCTAATCGGCATTTGGCAAACATAGCCGAGAGG

B-box2→

Human CTCAGGGAGGTCAAGTTGAGCCCA---GAGGGGCAGAAAGTTGATCATTGTGCACGCCAT ( 98 )  
Chimp CTCAGGGAGGTCAAGTTGAGCCCA---GAGGGGCAGAAAGTTGATCATTGTGCACACCCAT  
Gorilla CTTAGGGAGGTCAAATTTGAGCCCA---GAGGGGCAGAAAGTTGATCATTGTGCACGCCAT  
Orangutan CTCAGGGAGGTCAAATTTGAGCCCA---GAGGGGCAGAAAGTTGATCACTGTGCACGCCAT  
Gibbon CTCAGGGAGGTCAAGTTGAGCCCAGAGGAGGGGCAGAAAGTTGATCACTGTGCACGCCAC  
Rhes\_cDNA CTCAGGGAGGTCAAGTTGAGCCCAGAAGAGGGACAGAAAGTTGATCACTGTGCACGCCAT  
Baboon CTCAGGGAGGTCAAGTTGAGCCCAGAAGAGGGGCTGAAGTTGATCACTGTGCACGCCAT  
AGM CTCAGAGAGGTCAAGTTGAGCCCAGAAGAGGGGCAGAAAGTTGATCACTGTGCACGCCAT  
AGM\_cDNA CTCAGAGAGGTCAAGTTGAGCCCAGAAGAGGGGCAGAAAGTTGATCACTGTGCACGCCAT  
Tant\_cDNA CTCAGAGAGGTCAAGTTGAGCCCAGAAGAGGGGCAGAAAGTTGATCACTGTGCACGCCAT  
Patas CTCAGAGAGGTCAAGTTGAGCCCAGAAGAGGGGCAGAAAGTTGATCACTGTGCACGCCAT  
Colobus CTCAGGGAGGTCAAGTTGAGCCCAGAAGAGGGGCAGAAAGTTGATCACTGTGCACGCCAT  
DLangur CTCAGGGAGGTCAAGTTGAGCCCAGAAGAGGGGCAGAAAGTTGATCACTGTGCACGCCAT  
PMarmoset CTCAAAGAGGTCATGCTGAGCCCAGAGGAGGGGCAGAAAGTTGATCACTGTGCACGCCAT  
Tamarin CTCAAAGAGGTCATGCTGAGCCCAGAGGAGGGGCAGAAAGTTGATCACTGTGCACGCCAT  
Squirrel CTCAGGGAGGTCATGCTGAGCCCAGAGGAAAGGCAGAAAGTTGATCACTGTGCACGCCAT  
Owl CTCAGGGAGGTCATGCTGAGCCCAGAGGAGGGGCAGAAAGTTGATCACTGTGCACACCCAT  
Titi CTCAGGGAGGTCGCTGCTGAGCCCAGAGGAGGGGCAGAAAGTTGATCTCTGTGCACGCCAT  
Saki CTCAGGGAGGTCATGCTGAGCCCAGAGGAGGGGCAGAAAGTTGATCACTGTGCACGCCAT  
Howler CTCAGGGAGGTCATGTTGAGCCCAGAGGAGGGGCAGAAAGTTGATCGCTGTGCACGCCAT  
Spider CTCAGGGAGGTCATGTTGAGCCCAGAGGAAAGGCAGAAAGTTGATCGCTGTGCACGCCAT  
Woolly CTCAGGGAGGTCATGTTGAGCCCAGAGGAAAGGCAGAAAGTTGATCGCTGTGCACGCCAT

Human GGAGAGAAACTTCTACTCTTCTGTCTCAGGAGGACGGGAAGGTCATTTGCTGGCTTTGTGAG ( 118 )  
Chimp GGAGAGAAACTTCTACTCTTCTGTCTCAGGAGGACGGGAAGGTCATTTGCTGGCTTTGTGAG  
Gorilla GGAGAGAAACTTCTACTCTTCTGTCTCAGGAGGACGGGAAGGTCATTTGCTGGCTTTGCGAG  
Orangutan GGAGAGAAACTTCTACTCTTCTGTCTCAGGAGGACGGGAAGGTCATTTGCTGGCTTTGTGAG  
Gibbon GGAAAGAAACTTCTACTCTTCTGTCTCAGGAGGACAGGAAGGTCATTTGCTGGCTTTGTGAG  
Rhes\_cDNA GGAGAGAAACTCCTACTCTTCTGTCTCAGGAGGACAGCAAGGTCATTTGCTGGCTTTGTGAG  
Baboon GGAGAGAAACTCCTACTCTTCTGTCTCAGGAGGACAGCAAGGTCATTTGCTGGCTTTGTGAG  
AGM GGAGAGAAACTCCTACTCTTCTGTCTCAGGAGGACAGCAAGGTCATTTGCTGGCTTTGTGAG  
AGM\_cDNA GGAGAGAAACTCCTACTCTTCTGTCTCAGGAGGACAGCAAGGTCATTTGCTGGCTTTGTGAG  
Tant\_cDNA GGAGAGAAACTCCTACTCTTCTGTCTCAGGAGGACAGCAAGGTCATTTGCTGGCTTTGTGAG  
Patas GGAGAGAAACTCCTACTCTTCTGTCTCAGGAGGACAGGAAGGTCATTTGCTGGCTTTGTGAG  
Colobus GGAGAGAAACTCCTACTCTTCTGTCTCAGGAGGACAGGAAGGTCATTTGCTGGCTTTGTGAG  
DLangur GGAGAGAAACTCCTACTCTTCTGTCTCAGGAGGACAGGAAGGTCATTTGCTGGCTTTGTGAG  
PMarmoset GGAGAGAAACTTCTACTCTTCTGTCTCAGCAGGATGGAAATGTCATTTGCTGGCTTTGTGAG  
Tamarin GGAGAGAAACTTCTACTCTTCTGTCTCAGCAGGATGGAAATGTCATTTGCTGGCTTTGTGAG  
Squirrel GGAGAGAAACTTCTACTCTTCTGTCTCAGCAGGATGGAAATATCATTTGCTGGCTTTGTGAG  
Owl GGAGAGAAACTTGTACTCTTCTGTCTCAGCAGGATGGAAATGTCATTTGCTGGCTTTGTGAG  
Titi GGAGAGAAACTTCTACTCTTCTGTCTCAGCAGGATGGAAATGTCATTTGCTGGCTTTGTGAG  
Saki GGAGAGAAACTTCTACTCTTCTGTCTCAGCAGGATGGAAATGTCATTTGCTGGCTTTGTGAG  
Howler GGAGAGAAACTTCTACTCTTCTGTCTCAGCAGCATGGAAATGTCATTTGCTGGCTTTGTGAG  
Spider GGAGAGAAACTTCTACTCTTCTGTCTCAGCAGCATGGAAATGTCATTTGCTGGCTTTGTGAG  
Woolly GGAGAGAAACTTCTACTCTTCTGTCTCAGCAGCATGGAAATGTCATTTGCTGGCTTTGTGAG

Coiled-Coil→

|           |                                                                                      |
|-----------|--------------------------------------------------------------------------------------|
| Human     | <u>CGGTCTCAGGAGCACCGTGGTCACCAC</u> ACGTTCTC <u>CTCACAGAGGAGGTTGCCCGGGAGTAC</u> (138) |
| Chimp     | CGGTCTCAGGAGCACCGTGGTCACCACACGTTCCCTCACAGAGGAGGTTGCCCGGGAGTAC                        |
| Gorilla   | CGGTCTCAGGAGCACCGTGGTCACCACACGTTCCCTCACAGAGGAGGTTGCCCGGGAGTAC                        |
| Orangutan | CGGTCTCAGGAGCACCGTGGTCACCACACATTCCCTCACGGAGGAGGTTGCCCGAGAGTAC                        |
| Gibbon    | CGGTCTCAGGAGCACCGTGGTCACCACACATTCCCTCACGGAGGAGGTTGCCCGAGGAGTAC                       |
| Rhes_cDNA | CGGTCTCAGGAGCACCGTGGTCACCACACTTTCCCTCATGGAGGAGGTTGCCCGAGGAGTAC                       |
| Baboon    | CGGTCTCAGGAGCACCGTGGTCACCACACTTTCCCTCATGGAGGAGGTTGCCCGAGGAGTAC                       |
| AGM       | CGGTCTCAGGAGCACCGTGGTCACCACACTTTCCCTCATGGAGGAGGTTGCCCGAGGAGTAC                       |
| AGM_cDNA  | CGGTCTCAGGAGCACCGTGGTCACCACACTTTCCCTCATGGAGGAGGTTGCCCGAGGAGTAC                       |
| Tant_cDNA | CGGTCTCAGGAGCACCGTGGTCACCACACTTTCCCTCATGGAGGAGGTTGCCCGAGGAGTAC                       |
| Patas     | CGGTCTCAGGAGCACCGTGGTCACCACACTTTCCCTCATGGAGGAGGTTGCCCGAGGAGTAC                       |
| Colobus   | CGGTCTCAGGAGCACCGTGGTCACCACACGTTCCCTCATGGAGGAGGTTGCCCGAGGAGTAC                       |
| DLangur   | CGGTCTCAGGAGCACCGTGGTCACCACACGTTCCCTCATGGAGGAAGTTGCCCGAGGAGTAC                       |
| PMarmoset | CGGTCTCAAGAACACCGTGGTCACCACACATTCCCTCGTGGAGGAGGTTGCAGAGAAATAC                        |
| Tamarin   | CGGTCTCAAGAACATCGTGGTCACCACACATTACTCGTGGAGGAGGTTGCAGAGAAATAC                         |
| Squirrel  | CGGTCTCAAGAACACCGTGGTCACAACACATTCCCTCGTGGAGGAGGTTGCACAGAAATAC                        |
| Owl       | CGGTCTCAAGAACACCGTGGGCACCAGACATTCCCTTGTGGAGGAGGTTGCACAGAAATAC                        |
| Titi      | CGGTCTCAAGAACACCGTGGTCACCACACATTCCCTCGTGGAGGAGGTTGCACAGACATAC                        |
| Saki      | CGGTCTCAAGAACACCGTGGTCACCACACATTACTCGTGGAGGAGGTTGCACAGACATAC                         |
| Howler    | CGGTCTGAAGAACACCGTGGTCACCGCACATCCCTCGTGGAGGAGGTTGCACAGAAATAC                         |
| Spider    | CGGTCTCAAGAACACCGTGGTCACAGCACATTCCCTCGTGGAGGAGGTTGCACAGAAATAC                        |
| Woolly    | CGGTCTCAAGAACACCGTGGTCACAGCACATTCCCTCGTGGAGGAGGTTGCACAGAAATAC                        |

Exon3→

|           |                                                                            |
|-----------|----------------------------------------------------------------------------|
| Human     | <u>CAA</u> GTGAAGCTCCAGGCAGCTCTGGAGATGCTGAGGCAGAAGCAGCAGGAAGCTGAAGAG (158) |
| Chimp     | CAA GTGAAGCTCCAGGCAGCTCTGGAGATGCTGAGGCAGAAGCAGCAGGAAGCTGAAGAG              |
| Gorilla   | CAA GTGAAGCTCCAGGCAGCTCTGGAGATGCTGAGGCAGAAGCAGCAGGAAGCTGAAGAG              |
| Orangutan | CAA GTGAAGCTCCAGGCAGCTCTGGAGATGCTGAGGCAGAAGCAGCAGGAAGCTGAAGAG              |
| Gibbon    | CAA ATGAAGCTCCAGGCAGCTCTGGAGATGCTGAGGCAGAAGCAGCAGGAAGCTGAAGAG              |
| Rhes_cDNA | CAT GTGAAGCTCCAGACAGCTCTGGAGATGCTGAGGCAGAAGCAGCAGGAAGCTGAAAAG              |
| Baboon    | CAT GTGAAGCTCCAGACAGCTCTGGAGATGCTGAGGCAGAAGCAGCAGGAAGCTGAAAAG              |
| AGM       | CAT GTGAAGCTCCAGACAGCTCTGGAGATGCTGAGGCAGAAGCAGCAGGAAGCTGAAAAG              |
| AGM_cDNA  | CAT GTGAAGCTCCAGACAGCTCTGGAGATGCTGAGGCAGAAGCAGCAGGAAGCTGAAAAG              |
| Tant_cDNA | CAT GTGAAGCTCCAGACAGCTCTGGAGATGCTGAGGCAGAAGCAGCAGGAAGCTGAAAAG              |
| Patas     | CAT GTGAAGCTCCAGACAGCTCTGGAGATGCTGAGGCAGAAGCAGCAGGAAGCTGAAAAG              |
| Colobus   | CAC GTGAAGCTCCAGACAGCTCTGGAGATGCTGAGGCAGAAGCAGCAGGAAGCTGAAAAG              |
| DLangur   | CAC GTGAAGCTCCAGACAGCTCTGGAGATGCTGAGGCAGAAGCAGCAGGAAGCTGAAAAG              |
| PMarmoset | CAA GGAAAGCTCCAGGTAGCTCTGGAGATGATGAGGCAGAAGCAGCAGGATGCTGAAAAG              |
| Tamarin   | CAA GAAAAGCTCCAGGTAGCTCTGGAGATGATGAGGCAGAAGCAGCAGGATGCTGAAAAG              |
| Squirrel  | CGA GAAAAGCTCCAGGTAGCTCTGGAGACAATGAGGCAGAAGCAGCAGGATGCTGAAAAG              |
| Owl       | CGA GAAAAGCTCCAGGTAGCTCTGGAGATGATGAGGCAGAAGCAGAAGGATGCTGAAAAG              |
| Titi      | CGA GAAAATCTCCAGGTAGTTCTGGAGATGATGAGGCAGAAGCATCAGGATGCTGAAAAG              |
| Saki      | CGA GAAAATCTCCAGGTAGCTCTGGAGACGATGAGGCAGAAGCAGCAGGATGCTGAAAAG              |
| Howler    | CGA GAAAAGCTCCAGGCAGCTCTGGAGATGATGAGGCAGAAGGAGCAGGATGCTGAAAATG             |
| Spider    | CAA GAAAAGCTCCAGGTAGCTCTGGAGATGATGAGGCAGAAGCAGCAGGATGCTGAAAAG              |
| Woolly    | CGA GAAAAGCTCCAGGTAGCTCTGGAAATGATGAGGGAGAAGCAGCAGGATGCTGAAAAG              |

## Exon4→

|           |                                         |                       |       |
|-----------|-----------------------------------------|-----------------------|-------|
| Human     | TTGGAAGCTGACATCAGAGAAGAGAAAGCTTCCTGGAAG | ACTCAAATACAGTATGACAAA | (178) |
| Chimp     | TTGGAAGCTGACATCAGAGAAGAGAAAGCTTCCTGGAAG | ACTCAAATACAGTATGACAAA |       |
| Gorilla   | TTGGAAGCTGACATCAGAGAAGAGAAAGCTTCCTGGAAG | ACTCAAATACAGTATGACAAA |       |
| Orangutan | TTGGAAGCTGACATCAGAGAAGAGAAAGCTTCCTGGAAG | ACTCAAATACAGTATGACAAA |       |
| Gibbon    | TTGGAAGCTGACATCAGAGAAGAGAAAGCTTCCTGGAAG | ACTCAAATACAGTATGACAAA |       |
| Rhes_cDNA | TTGGAAGCTGACATCAGAGAAGAGAAAGCTTCCTGGAAG | ATTCAAATACAGTACGACAAA |       |
| Baboon    | TTGGAAGCTGACATCAGAGAAGAGAAAGCTTCCTGGAAG | ATTCAAATACAGTACGACAAA |       |
| AGM       | TTGGAAGCTGACATCAGAGAAGAGAAAGCTTCCTGGAAG | ATTCAAATACAGTACGACAAA |       |
| AGM_cDNA  | TTGGAAGCTGACATCAGAGAAGAGAAAGCTTCCTGGAAG | ATTCAAATACAGTACGACAAA |       |
| Tant_cDNA | TTGGAAGCTGACATCAGAGAAGAGAAAGCTTCCTGGAAG | ATTCAAATACAGTACGACAAA |       |
| Patas     | TTGGAAGCTGACATCAGAGAAGAGAAAGCTTCCTGGAAG | ATTCAAATACAGTACGACAAA |       |
| Colobus   | TTGGAAGCTGACATCAGAGAAGAGAAAGCTTCCTGGAAG | ATTCAAATACAGTATGACAAA |       |
| DLangur   | TTGGAAGCTGACATCAGAGAAGAGAAAGCTTCCTGGAAG | ATTCAAATACAGTGCACAAA  |       |
| PMarmoset | TTAGAAGCTGATGTCAGAGAAGAGCAAGCTTCCTGGAAG | ATTCAAATACAAAATGACAAA |       |
| Tamarin   | TTGGAAGCTGACGTCAGAGAAGAGCAAGCTTCCTGGAAG | ATTCAAATACGAAATGACAAA |       |
| Squirrel  | TTGGAAGCTGACGTCAGACAAGAGCAAGCTTCCTGGAAG | ATTCAAATACAAAATGACAAA |       |
| Owl       | TTGGAAGCTGACGTCAGAGAAGAGCAAGCTTCCTGGAAG | ATTCAAATACAAAATGACAAA |       |
| Titi      | TTGGAAGCTGACGTCAGAGAAGAGCAAGCTTCCTGGAAG | ATTCAAATACAAAATGACAAA |       |
| Saki      | TTAGAAGCTGACGTCAGAGAAGAGCAAGCTTCCTGGAAG | ATTCAAATACGAGATGACAAA |       |
| Howler    | TTGGAAGCTGACGTCAGAGAAGAGCAAGCTTCCTGGAAG | ATTCAAATAGAAAATGACAAA |       |
| Spider    | TTGGAAGCTGATGTCAGAGAAGAGCAAGCTTCCTGGAAG | ATTCAAATAGAAAATGACAAA |       |
| Woolly    | TTGGAAGCTGATGTCAGAGAAGAGCAAGCTTCCTGGAAG | ATTCAAATAAAAACGACAAA  |       |

|           |                                                              |       |
|-----------|--------------------------------------------------------------|-------|
| Human     | ACCAACGTCTTGGCAGATTTTGAGCAACTGAGAGACATCCTGGACTGGGAGGAGAGCAAT | (198) |
| Chimp     | ACCAACGTCTTGGCAGATTTTGAGCAACTGAGAGACATCCTGGACTGGGAGGAGAGCAAT |       |
| Gorilla   | ACCAACGTCTTGGCAGATTTTGAGCAACTGAGAGACATCCTGGACTGGGAGGAGAGCAAT |       |
| Orangutan | ACCAGCGTCTTGGCAGATTTTGAGCAACTGAGAGACATCCTGGACTGGGAGGAGAGCAAT |       |
| Gibbon    | ACCAACATCTTGGCAGATTTTGAGCAACTGAGACACATCCTGGACTGGGTGGAGAGCAAT |       |
| Rhes_cDNA | ACCAACGTCTCGGCAGATTTTGAGCAACTGAGAGAGATCCTGGACTGGGAGGAGAGCAAT |       |
| Baboon    | ACCAACGTCTCGGCAGATTTTGAGCAACTGAGAGAGATCCTGGACTGGGAGGAGAGCAAT |       |
| AGM       | ACCAACGTCTCGGCAGATTTTGAGCAACTGAGAGAGATCCTGGACTGGGAGGAGAGCAAT |       |
| AGM_cDNA  | ACCAACGTCTCGGCAGATTTTGAGCAACTGAGAGAGATCCTGGACTGGGAGGAGAGCAAT |       |
| Tant_cDNA | ACCAACGTCTCGGCAGATTTTGAGCAACTGAGAGAGATCCTGGACTGGGAGGAGAGCAAT |       |
| Patas     | ACCAACGTCTTGGCAGATTTTGAGCAACTGAGAGAGATCCTGGACTGGGAGGAGAGCAAT |       |
| Colobus   | ACCAACGTCTTGGCAGATTTTGAGCAACTGAGAGAGATCCTGGACTGGGAGGAGAGCAAT |       |
| DLangur   | ACCAATGTCTTGGCAGATTTTGAGCAACTGAGAGAGATCCTGGACTGGGAGGAGAGCAAT |       |
| PMarmoset | ACCAACATCATGGCAGAGTTTAAGCAACTGAGAGACATCCTGGACTGTGAGGAGAGCAAA |       |
| Tamarin   | ACCAACATCATGGCAGAGTTTAAGCAACTGAGAGACATCCTGGACTGTGAGGAGAGCAAA |       |
| Squirrel  | ACCAACATCATGGCAGAGTTTAAGCAACTGAGAGACATCCTGGACTGTGAGGAGAGCAAT |       |
| Owl       | ACCAACATCATGGCAGAGTTTAAAAACGGAGAGACATCCTGGACTGTGAGGAGAGCAAA  |       |
| Titi      | ACCAACATCATGGCAGAGTTTAAGCAACTGAGAGACATCCTGGACTGTGAGGAGAGCAAT |       |
| Saki      | ACCAACATTATGGCAGAGTTTAAGCAACTGAGAGACATCCTGGACTGTGAGGAGAGCAAT |       |
| Howler    | ACCAGCACCTTGGCAGAGTTTAAGCAACTGAGAGACATCCTGGACTGTGAGGAGAGCAAC |       |
| Spider    | ACCAACATCCTGGCAGAGTTTAAGCAACTGAGAGACATCCTGGACTGTGAGGAGAGCAAT |       |
| Woolly    | ACCAACATCCTGGCAGAGTTTAAGCAACTGAGAGACATCCTGGACTGTGAGGAGAGCAAT |       |

Human GAGCTGCAAAACCTGGAGAAGGAGGAGGAAGACATTCTGAAAAGCCTTACGAACTCTGAA ( 218 )  
Chimp GAGCTGCAAAACCTGGAGAAGGAGGAGGAAGACATTCTGAAAAGCCTTACGAAGTCTGAA  
Gorilla GAGCTGCAAAACCTGGAGAAGGAGGAGGAAGACATTCTGAAAAGCCTTACGAAGTCTGAA  
Orangutan GAGCTGCAAAACCTGGAGAAGGAGGAGGAAGACATTCTAAAAAGCCTTACGAAGTCTGAA  
Gibbon GAGCTGCAAAACCTGGAGAAGGAGGAGAAAAGACGTTCTGAAAAGGCTTATGAGGTCTGAA  
Rhes\_cDNA GAGCTGCAGAACCTGGAGAAGGAGGAAGAAGACATTCTGAAAAGCCTTACGAAGTCTGAA  
Baboon GAGCTGCAGAACCTGGAGAAGGAGGAAGAAGACATTCTGAAAAGCCTTACGAAGTCTGAA  
AGM GAGCTGCAGAACCTGGAGAAGGAGGAAGAAGACATTCTGAAAAGCCTTACGAAGTCTGAA  
AGM\_cDNA GAGCTGCAGAACCTGGAGAAGGAGGAAGAAGACATTCTGAAAAGCCTTACGAAGTCTGAA  
Tant\_cDNA GAGCTGCAGAACCTGGAGAAGGAGGAAGAAGACATTCTGAAAAGCCTTACGAAGTCTGAA  
Patas GAGCTGCAGTACCTGGAGAAGGAGGAAGAAGACATTCTGAAAAGCCTTACGAAGTCTGAA  
Colobus GAGCTGCAGAACCTGGAGAAGGAGGAGGAAGACATTCTGAAAAGCCTTACGAAGTCTGAA  
DLangur GAGCTGCAGAACCTGGAGAAGGAGGAGGAAGACATTCTGAAAAGCCTTACGAAGTCTGAA  
PMarmoset GAGCTGCAAAACCTGGAGAAGGAGGAGAAAACATTCTGAAAAGACTTGTACAGTCTGAA  
Tamarin GAGCTGCAAAACCTGGAGAAGGAGGAGAAAACATTCTGAAAAGACTTGTACAGTCTGAA  
Squirrel GAGCTGCAAAACCTGGAGAAGGAGGAGAAAACATTCTGAAAAGACTTGTACAGTCTGAA  
Owl GAGTTGCAAAACCTGGAGAAGGAGGAGAAAACATTCTGAAAAGACTTGTACAGTCTGAA  
Titi GAGCTGCAAAACCTAGAGAAGGAGGAGAAAACATTCTGAAAAGACTTGTACAGTCTGAG  
Saki GAGCTGCAAAATCCTAGAGAAGGAGGAGAAAACATTCTGAAAAGACTTACAAGTCTGAA  
Howler GAGCTGCAAAAACCTGGAGAAGGAGGAGAAAACCTTCTGAAAAGACTTGTACAGTCTGAA  
Spider GAGCTACAAAACCTGGAGAAGGAGGAGAAAACCTTCTGAAAACACTTGCACAGTCTGAA  
Woolly GAGCTGCAAAACCTGGAGAAGGAGGAGAAAACCTTCTGAAAATACTTGCACAGTCTGAA

Human ACTGAGATGGTGCAGCAGACCCAGTCCCTGAGAGAGCTCATCTCAGATCTGGAGCATCGG ( 238 )  
Chimp ACTGAGATGGTGCAGCAGACCCAGTCCCTGAGAGAGCTCATCTCAGATCTGGAGCGTCCG  
Gorilla ACTGAGATGGTGCAGCAGACCCAGTCCCTGAGAGAGCTCATCTCAGATCTGGAGCATCGG  
Orangutan ACTGAGATGGTGCAGCAGACCCAGTCCCTGAGAGAGCTCATCTCAGATGTGGAGCATCGG  
Gibbon ATTGAGATGGTGCAGCAGACCCAGTCCCTGAGAGAGCTCATCTCAGATCTGGAGCATCGG  
Rhes\_cDNA ACGGAGATGGTGCAGCAGACCCAGTACATGAGAGAGCTCATCTCAGAAGTGGAGCATCGG  
Baboon ACGGAGATGGTGCAGCAGACCCAGTACATGAGAGAGCTCATCTCAGATCTGGAGCATCGG  
AGM ACGGAGATGGTGCAGCAGACCCAGTACATGAGAGAGCTCATCTCAGATCTGGAGCATCGG  
AGM\_cDNA ACGGAGATGGTGCAGCAGACCCAGTACATGAGAGAGCTCATCTCAGATCTGGAGCATCGG  
Tant\_cDNA ACGGAGATGGTGCAGCAGACCCAGTACATGAGAGAGCTCATCTCAGATCTGGAGCATCGG  
Patas ACGAAGATGGTGCAGCAGACCCAGTACCTGAGAGAGCTCATCTCAGATCTGGAGCATCGG  
Colobus ACTGAGATGGTGCAGCAGACCCAGTACATGAGAGAGCTCGTCTCAGATCTGGAGCATCGG  
DLangur ACTGAGATGGTGCAGCAGACCCAGTACATGAGAGAGCTCATCTCAGATCTGGAGCATCGG  
PMarmoset AGTGACATGGTGCTGCAGACCCAGTCCATTAGAGTGCTCATCTCAGATCTGGAGCGTCCG  
Tamarin AGTGACATGGTGCTGCAGACCCAGTCCATGAGAGTGCTCATCTCAGATCTGGAGCGTCCG  
Squirrel AATGACATGGTGCTGCAGACCCAGTCCCTGAGAGTGCTCATCTCAGATCTGGAGCGTCCG  
Owl AATGACATGGTGCTGCAGACCCAGTCCCTGAGAGTGCTCATCTCAGATCTGGAGCATCGC  
Titi AATGACATGGTGCTGCAGACCCAGTCCATAAGCGTGCTCATCTCGGATCTGGAGCATCGC  
Saki AATGACATGGTGCTGCAGACCCAGTCCATGGAGTGCTCATCTCAGATCTGGAGCATCGC  
Howler AATGACATGGTGTTGCAGACCCAGTCCATAAGAGTGCTCATTCAGACCTGGAGCGTCCG  
Spider AATGACATGGTGCTGCAGACCCAGTCCATGAGAGTGCTCATCGCAGATCTGGAGCACCGC  
Woolly AATGACATGGTGCTGCAGACCCAGTCCATGAGAGTGCTCATCGCAGATCTGGAGCATCGC

|           |                                | Exon5→                    | Exon6→          |
|-----------|--------------------------------|---------------------------|-----------------|
| Human     | CTGCAGGGGTCACTGATGGAGCTGCTTCAG | GGTGTGGATGGCGTCATAAAAAAG  | GACGGAG ( 258 ) |
| Chimp     | CTGCAGGGGTCACTGATGGAGCTGCTTCAG | GGTGTGGATGGCGTCATAAAAAAG  | GATGGAG         |
| Gorilla   | CTGCAGGGGTCACTGATGGAGCTGCTTCAG | GGTGTGGATGGCGTCATAAAAAAG  | GATGGAG         |
| Orangutan | CTGCAGGGGTCACTGATGGAGCTGCTTCAG | GGTGTGGATGGCATCATAAAAAAG  | GATGCAG         |
| Gibbon    | CTGCAGGGGTCACTGATGGAGCTGCTTCAG | GGTGTGGATGGCGTCATAAAAAAG  | GATGAAG         |
| Rhes_cDNA | TTGCAGGGGTCAATGATGGATCTACTGCAG | GGTGTGGATGGCATCATTAAAAAG  | GATTGAG         |
| Baboon    | TTGCAGGGGTCAATGATGGAGCTACTGCAG | GGTGTGGATGGCATCATTAAAAAG  | GATTGAG         |
| AGM       | TTGCAGGGGTCAATGATGGAGCTGCTGCAG | GGTGTGGATGGCATCATTAAAAAG  | GATTGAG         |
| AGM_cDNA  | TTGCAGGGGTCAATGATGGAGCTGCTGCAG | GGTGTGGATGGCATCATTAAAAAG  | GGTTGAG         |
| Tant_cDNA | TTGCAGGGGTCAATGATGGAGCTGCTGCAG | GGTGTGGATGGCATCATTAAAAAG  | GATTGAG         |
| Patas     | TTGCAGGGGTCAATGATGGAGCTGCTGCAG | GGTGTGGATGGCATCATTAAAAAG  | GATTGAG         |
| Colobus   | TTGCAGGGGTCACTGATGGAGCTGCTGCAG | GGTGTGGATGGCATCATAAAAAAG  | GATTGAG         |
| DLangur   | TTGCAGGGGTCAATGATGGAGCTGCTGCAG | GGTGTGGATGGCATCATAAAAAAG  | GATTGAG         |
| PMarmoset | CTGCAGGGGTCAATGATGGAGCTTTTACAG | GGTGTGGATGACGTCATAAAAAAG  | GATTGAG         |
| Tamarin   | CTGCAGGGGTCACTGCTGGAGCTGTTACAG | GGTGTGGATGATGTCATAAAAAAG  | GATTGAG         |
| Squirrel  | CTGCAGGGGTCACTGGTGGAGCTGTTACAG | GATGTGGATGGTGTTCATAAAAAAG | GATTGAG         |
| Owl       | CTGCAGGGGTCACTGATGGAGCTGTTACAG | GGTGTGGATGGTGTTCATAAAAAAG | GATTGAG         |
| Titi      | CTGCAGGGGTCACTGATGGAGCTGTTACAG | GGTGTGGATGGCGTCATAAAAAAG  | GGTTAAG         |
| Saki      | CTGCAGGGGTCACTGATGGAGCTGTTACAG | GGTGTGGATGAAGTCATAAAAAAG  | GGTTAAG         |
| Howler    | CTGCAGGGGTCACTTATGGAGCTGTTACAG | GGTGTGGAAGGCGTCATAAAAAAG  | GATTAAG         |
| Spider    | CTGCAGGGGTCACTGATGGAGCTGTTACAG | GATGTGGAAGGCGTCATAAAAAAG  | GATTAAG         |
| Woolly    | CTGCAGGGGTCACTGATGGAGCTGTTACAG | GGTGTGGAAGGCATCATAAAAAAG  | GACTACG         |

|           |                                                                        |
|-----------|------------------------------------------------------------------------|
| Human     | AACGTGACCTTGAAGAAGCCAGAAAACCTTTTCCAAAAAATCAAAGGAGAGTGTTTCGAGCT ( 278 ) |
| Chimp     | AACGTGACCTTGAAGAAGCCAGAAAACCTTTTCCAAAAAATCAAAGGAGAGTGTTTCGAGCT         |
| Gorilla   | AACGTGACCTTGAAGAAGCCAGAAAACCTTTTCCAAAAAATCAAAGGAGAGTGTTTCGAGCT         |
| Orangutan | AACGTGACCTTGAAGAAGCCAGAAAACCTTTTCCAAAAAATCAAAGGAGAGTGTTTCGAGCT         |
| Gibbon    | AACGTGACCTTGAAGAAGCCAGAAAACCTTTTCCAAAAAATCAAAGGAGAGTGTTTCGAGCT         |
| Rhes_cDNA | AACATGACCTTGAAGAAGCCAAAAACCTTTTCCAAAAAATCAAAGGAGAGTGTTTCGAGCT          |
| Baboon    | AACATGACCTTGAAGAAGCCAAAAACCTTTTCCAAAAAATCAAAGGAGAGTGTTTCGAGCT          |
| AGM       | AACATGACCTTGAAGAAGCCAAAAACCTTTTCCAAAAAATCAAAGGAGAGTGTTTCGAGCT          |
| AGM_cDNA  | AACATGACCTTGAAGAAGCCAAAAACCTTTTCCAAAAAATCAAAGGAGAGTGTTTCGAGCT          |
| Tant_cDNA | AACATGACCTTGAAGAAGCCAAAAACCTTTTCCAAAAAATCAAAGGAGAGTGTTTCGAGCT          |
| Patas     | AACATGACCTTGAAGAAGCCAGAAAACCTTTTCCAAAAAATCAAAGGAGAGTGTTTCGAGCT         |
| Colobus   | GACATGACCTTGAAGAAGCCAAAAACCTTTTCCAAAAAATCAAAGGAGAGTGTTTCGAGCT          |
| DLangur   | AACATGACCTTGAAGAAGCCAAAAACCTTTTCCAAAAAATCAAAGGAGAGTGTTTCGAGCT          |
| PMarmoset | AAAGTTACTTTGCAGAAGCCAAAAACCTTTTCTTAATGAAAAAAGGAGAGTATTTTCGAGCT         |
| Tamarin   | ACAGTGACTTTGCAGAAGCCAAAAACCTTTTCTTAATGAAAAAAGGAGAGTATTTTCGAGCT         |
| Squirrel  | AAAGTGACTTTGCAGAAGCCAAAAACCTTTTCTTAATGAAAAAAGGAGAGTATTTTCGAGCT         |
| Owl       | AAAGTGACTTTGCAGAATCCAAAAACCTTTTCTTAATGAAAAAAGGAGAATATTTCAAACCT         |
| Titi      | AATGTGACTTTGCAGAAGCCAAAAACCTTTTCTTAATGAAAAAAGGAGAGTATTTTCGAGTT         |
| Saki      | AACGTGACTTTGCAGAAGCCGAAAACCTTTTCTTAATGAAAAAAGGAGAGTATTTTCGAGCT         |
| Howler    | AACGTGACTTTGCAGAAGCCAGAAAACCTTTTCTTAATGAAAAAAGGAGAGTATTTCAAGCT         |
| Spider    | AATGTGACTTTGCAGAAGCCAAAAACCTTTTCTTAATGAAAAAAGGAGAGTATTTTCGAGCT         |
| Woolly    | AATGTGACTTTGCAGAAGCCAAAAACCTTTTCTTAATGAAAAAAGGAGAGTATTTTCGAGCT         |

|           |                                     | Exon7→                      | SPRY→        |         |
|-----------|-------------------------------------|-----------------------------|--------------|---------|
| Human     | CCTGATCTGAAAGGAATGCTAGAAAGTGTTTAGAG | AGCTGACAGATGTC              | CGACGCTACTGG | ( 298 ) |
| Chimp     | CCTGATCTGAAAGGAATGCTAGAAAGTGTTTAGAG | AGCTGACAGATGTCCGACGCTACTGG  |              |         |
| Gorilla   | CCTGATCTGAAAGGAATGCTAGAAAGTGTTTAGAG | AGCTGACAGATGTCCGACGCTACTGG  |              |         |
| Orangutan | CCTAATCTGAAAGGAATGCTAGAAAGTGTTTAGAG | AGCTGACAGATGTCCGACGCTACTGG  |              |         |
| Gibbon    | GCTGATCTGAAAGTAATGCTAGAAAGTGTTTAGAG | AGCTGAGAGATGTCCGACGCTACTGG  |              |         |
| Rhes_cDNA | CCTGATCTGAAAGGAATGCTAGACATGTTTAGAG  | AGCTAACAGATGCCCCGACGCTACTGG |              |         |
| Baboon    | CCTGATCTGAAAGGAATGCTAGACATGTTTAGAG  | AGCTAACAGATGTCCGACGCTACTGG  |              |         |
| AGM       | CCTGATCTGAAAGGAATGCTAGACATGTTTAGAG  | AGCTAACAGATGTCCGACGCTACTGG  |              |         |
| AGM_cDNA  | CCTGATCTGAAAGGAATGCTAGACATGTTTAGAG  | AGCTAACAGATGTCCGACGCTACTGG  |              |         |
| Tant_cDNA | CCTGATCTGAAAGGAATGCTAGACATGTTTAGAG  | AGCTAACAGATGTCCGACGCTACTGG  |              |         |
| Patas     | CCTGCTCTGAAAGGAATGCTAGACATGTTTAGAG  | AGCTAACAGATGTCCGGCGCTACTGG  |              |         |
| Colobus   | CCTGATCTGAAAGGAATGCTAGACATGTTTAGAG  | AGCTAACAGATGTCCGACGCTACTGG  |              |         |
| DLangur   | CCTGATCTGAAAGGAATCCTAGACATGTTTAGAG  | AACCTAACAGATGTCCGACGCTACTGG |              |         |
| PMarmoset | CCTGATCTGAAAGGAATGCTACAAGCATTAAAG   | AGCTGACAGAAGTCCAACGCTACTGG  |              |         |
| Tamarin   | CCTGATCTGAAAGCAATGCTACAAGCATTAAAG   | AGCTGACAGAAGTCCAACGCTACTGG  |              |         |
| Squirrel  | CCTGATCTGAAAGGAATGCTCCAAGTGTAAAG    | AACTGACAGAAGTCCAACGCTACTGG  |              |         |
| Owl       | CCTGATCTGAAAGGAACACTACAAGTGTAAAG    | AGCCGACAGAAGTCCAACGCTACTGG  |              |         |
| Titi      | CCTGATCTGAAAGGAATGCTACAAGTGTCTAAAG  | AGTTGACAGAAGTCCAACGCTACTGG  |              |         |
| Saki      | CCTGATCTGAAAGGAATGCTACAAGTGTCTAAAG  | AGCTGACAGAAGTCCAACGCTACTGG  |              |         |
| Howler    | CCTGATCTGAAAGGAATGCTACAAGTGTCTAAAG  | AGCTGAAAGAAGTCCAGTGCTACTGG  |              |         |
| Spider    | CCTGATCTGAAAGGAATGCTACAAGTGTCTAAAG  | AGCTGAAAGAAGTCCAGTGCTACTGG  |              |         |
| Woolly    | CCTAATCTGAAAGGAATGCTACAAGTGTCTAAAG  | AGCTGAAAGAAGTCCAATGCTACTGG  |              |         |

|           | Exon8→                              | C      | A       | V       | I   | S      | E   | D | K | R |         |
|-----------|-------------------------------------|--------|---------|---------|-----|--------|-----|---|---|---|---------|
| Human     | G TTGATGTGACAGTGGCTCCAAACAACATTTCA  | TGTGCT | GTCATT  | TCTGAA  | GAT | AAG    | AGA |   |   |   | ( 318 ) |
| Chimp     | G TTGATGTGACAGTGGCTCCAAACAACATTTCA  | TGTGCT | GTCATTT | CTGAAG  | AT  | GAGA   |     |   |   |   |         |
| Gorilla   | G TTGATGTGACAGTGGCTCCAAACAACATTTCA  | TGTGCT | GTCATTT | CTGAAG  | AT  | GAGA   |     |   |   |   |         |
| Orangutan | G TTGATGTGACAGTGGCTCCAAACGACATTTCA  | TATGCT | GTCATTT | CTGAAG  | AT  | GAGA   |     |   |   |   |         |
| Gibbon    | G TTGATGTGACAGTGGCTCCAAACAACATTTCA  | TATGCT | GTCATTT | CTGAAG  | AT  | GAGA   |     |   |   |   |         |
| Rhes_cDNA | G TTGATGTGACACTGGCTACAAACAACATTTTCG | CATGCT | GTCATT  | GCTGAAG | AT  | AAGAGA |     |   |   |   |         |
| Baboon    | G TTGATGTGACACTGGCTCCAAACAACATTTTCG | CATGCT | GTCATT  | GCTGAAG | AT  | AAGAGA |     |   |   |   |         |
| AGM       | G TTGATGTGACACTGGCTCCAAACAACATTTTCG | CATGCT | GTCATT  | GCTGAAG | AT  | AAGAGA |     |   |   |   |         |
| AGM_cDNA  | G TTGATGTGACACTGGCTCCAAACAACATTTTCG | CATGCT | GTCATT  | GCTGAAG | AT  | AAGAGA |     |   |   |   |         |
| Tant_cDNA | G TTGATGTGACACTGGCTCCAAACAACATTTTCG | CATGCT | GTCATT  | GCTGAAG | AT  | AAGAGA |     |   |   |   |         |
| Patas     | G TTGATGTGACACTGGCTCCAAACAACATTTTCG | CATGTT | GTCATT  | GCTGAAG | AT  | AAGAGA |     |   |   |   |         |
| Colobus   | G TTGATGTGACACTGGCTCCAAACAACATTTCA  | CATGCT | GTCATT  | GCTGAAG | AT  | AAGAGA |     |   |   |   |         |
| DLangur   | G TTGATGTGACACTGGCTCCAAACAACATTTCA  | CATGCT | GTCATT  | GCTGAAG | AT  | AAGAGA |     |   |   |   |         |
| PMarmoset | G CTCATGTGACACTGGTTCCAAGTCACCCTTCA  | TGTACT | GTCATTT | CTGAAG  | AT  | GAGAGA |     |   |   |   |         |
| Tamarin   | G CTCATGTGACACTGGTTCCAAGTCACCCTTCA  | TATGCT | GTTATTT | CTGAAG  | AT  | GAGAGA |     |   |   |   |         |
| Squirrel  | G CTCATGTGACACTGGTTCCAAGTCACCCTTCA  | TATACT | ATCATTT | CTGAAG  | AT  | GGGAGA |     |   |   |   |         |
| Owl       | G CTCATGTGACACTGGTTCCAAGTCACCCTTCA  | TGTACT | GTCATTT | CTGAAG  | AT  | GAGAGA |     |   |   |   |         |
| Titi      | G CTCATGTGACACTGGTTGCAAGTCACCCTTCA  | CGTGCT | GTCATTT | CTGAAG  | AT  | GAAAGA |     |   |   |   |         |
| Saki      | G TTCATGTGACACTGGTTCCAAGTCACCCTTCA  | TGTGCT | GTCATTT | CTGAAG  | AT  | GAGAGA |     |   |   |   |         |
| Howler    | G CTCATGTGACACTGATTCCGAATCACCCTTCA  | TGTACT | GTCATTT | CTGAAG  | AT  | AAGAGA |     |   |   |   |         |
| Spider    | G CTCATGTGACACTGGTTCCAAGTCACCCTTCA  | TGTACT | GTCATTT | CTGAAG  | AT  | GAGAGA |     |   |   |   |         |
| Woolly    | G CTCATGTGACACTGGTTCCAAGTCACCCTTCA  | TGTGCT | GTCATTT | CTGAAG  | AT  | CAGAGA |     |   |   |   |         |



(Patch)→

Q V S S P K P Q I I Y G A R G T R Y Q T

|           |       |             |        |        |         |       |            |         |       |       |                 |       |     |
|-----------|-------|-------------|--------|--------|---------|-------|------------|---------|-------|-------|-----------------|-------|-----|
| Human     | CAAGT | GAGCTCTCCG  | AAACCA | CAGATA | AATATAT | GGGGC | ACGAGGGACA | AAGATAC | CAG   | ---   | ACA             | (338) |     |
| Chimp     | CAAGT | GAGCTCTCCG  | AAACCA | CAGATA | AATATAT | GGGGC | ACGAGGGACA | AAGATAT | CAG   | ---   | ACA             |       |     |
| Gorilla   | CAAGT | GAGCTCTCCG  | AAACCA | CAGATA | AATATAT | GGGGC | ACGAGGGACA | AAGATAT | CAG   | ---   | ACA             |       |     |
| Orangutan | CAAGT | GAGCTGTCCG  | GAACCA | CAGATA | AATATAT | GGGGC | ACGAGGGACA | AACATAT | CAG   | ---   | ACA             |       |     |
| Gibbon    | CAAGT | GAGCTCTCCG  | GAACCA | CAGATA | AATATTT | GAGGC | ACGAGGGACA | AATATCT | CAG   | ---   | ACA             |       |     |
| Rhes_cDNA | CAAGT | GAGCTCTCGG  | AACCCA | CAGATA | AATGTAT | CAGGC | ACCAGGGAC  | ATTATTT | ACG   | ---   | TTT             |       |     |
| Baboon    | CAAGT | GAGCTCTCGG  | AACCCA | CAGATA | AACGTAT | CAGGC | ACCAGGGAC  | ATTATTT | TCC   | ---   | TTT             |       |     |
| AGM       | CAAGT | GAGCTATCAGA | AACCCA | CAGATA | AATGTAT | CAGGC | ACCAGGGT   | CATCAT  | TTT   | GGG   | ---             | TCA   |     |
| AGM_cDNA  | CAAGT | GAGCTATCGG  | AACCCA | CAGATA | AATGTAT | CAGT  | CACCAGGGT  | CATTAT  | TTT   | GGG   | ---             | TCA   |     |
| Tant_cDNA | CAAGT | GAGCTATCAGA | AACCCA | CAGATA | AATGTAT | CAGGC | ACCAGGGT   | CATCAT  | TTT   | GGG   | ---             | TCA   |     |
| Patas     | CAAGT | GAGCTCTCGG  | AACCCA | CAGATA | AATGTAT | TGGGC | ACGAGGAA   | ATTATTT | CAG   | ---   | TCA             |       |     |
| Colobus   | CGAGT | GAGCTCTCCG  | AACCCA | CAGATA | AATGTAT | CGGGC | ACGAGGAC   | ATTATTT | CAG   | ---   | TCA             |       |     |
| DLangur   | CAAGT | GAGCTCTCCG  | AACCCA | CAGATA | AATGTGT | CGGGC | ACGAGGAC   | ATTATTT | CAG   | ---   | TCA             |       |     |
| PMarmoset | CAAGT | GAGATATCAG  | GTTCCG | -----  | -----   | ----- | -----      | -----   | ----- | ----- | ATACATCAA       | ---   | CCA |
| Tamarin   | CAAGT | GAGATATCAG  | TTTCAG | -----  | -----   | ----- | -----      | -----   | ----- | ----- | ATACATCAA       | ---   | CCA |
| Squirrel  | CAAGT | GAGATATCAG  | AAACCT | -----  | -----   | ----- | -----      | -----   | ----- | ----- | ATACGTCAC       | ---   | CTA |
| Owl       | CAAGT | GAGATATCAG  | AAACGG | -----  | -----   | ----- | -----      | -----   | ----- | ----- | ATATATCAA       | ---   | CCA |
| Titi      | CAAGT | GAGATATCAG  | GAATGG | -----  | -----   | ----- | -----      | -----   | ----- | ----- | ATACATCAA       | ---   | TCA |
| Saki      | CAAGT | GAGATATCAG  | GAACGG | -----  | -----   | ----- | -----      | -----   | ----- | ----- | ATACATCAA       | ---   | TCA |
| Howler    | GAAGT | GAGATATCAG  | GAACAG | -----  | -----   | ----- | -----      | -----   | ----- | ----- | ATACATCATCACCCG | ---   |     |
| Spider    | CAAGT | GAGATATCAG  | GAACAG | -----  | -----   | ----- | -----      | -----   | ----- | ----- | ATACATCAA       | ---   | CCA |
| Woolly    | CAAGT | GAGATATCAG  | AAACAG | -----  | -----   | ----- | -----      | -----   | ----- | ----- | AGACATCGA       | ---   | CCA |

|           |                                                               |
|-----------|---------------------------------------------------------------|
| Human     | -----                                                         |
| Chimp     | -----                                                         |
| Gorilla   | -----                                                         |
| Orangutan | -----                                                         |
| Gibbon    | -----                                                         |
| Rhes_cDNA | CCGTCA-----                                                   |
| Baboon    | CCGTCA-----                                                   |
| AGM       | CTCACGAATTTCAATTATTGTACTGGCGTCCCTGGGCTCCCAAAGTATCACATCAAGGAAA |
| AGM_cDNA  | CTCACGAATTTCAAGTTATTGTACTGGCGTCCCGGGCTCCCAAAGTATCACATCAGGGAAA |
| Tant_cDNA | CTCACGAATTTCAATTATTGTACTGGCGTCCCTGGGCTCCCAAAGTATCACATCAAGGAAA |
| Patas     | -----                                                         |
| Colobus   | -----                                                         |
| DLangur   | -----                                                         |
| PMarmoset | -----                                                         |
| Tamarin   | -----                                                         |
| Squirrel  | -----                                                         |
| Owl       | -----                                                         |
| Titi      | -----                                                         |
| Saki      | -----                                                         |
| Howler    | -----                                                         |
| Spider    | -----                                                         |
| Woolly    | -----                                                         |

F V N F N Y C T G I

Human TTTGTG AATTTCAATTATTGTACTGGCATCCTGGGCTCTCAAAGTATCACATCAGGGAAA ( 358 )  
Chimp TTTATG AATTTCAATTATTGTACTGGCATCCTGGGCTCTCAAAGTATCACATCAGGGAAA  
Gorilla TTTATG AATTTCAATTATTGTACTGGCATCCTGGGCTCTCAAAGTATCACATCAGGGAAA  
Orangutan TATGTG AATTTCAATTATTGTACTGGCATCCTGGGCTCTCAAAGTATCACGT CAGGGAAA  
Gibbon TTTGTG AATTTCAATTATTGTACTGGCATCCTGGGCTCTCAAAGTATCACATCAGGGAAA  
Rhes\_cDNA CTCACG AATTTCAATTATTGTACTGGCGTCTGGGCTCCCAAAGTATCACATCAGGGAAAG  
Baboon CTCACG AATTTCAATTATTGTACTGGCGTCTGGGCTCCCAAAGTATCACATCAGGGAAAG  
AGM CTCACG AATTTCAATTATTGTACTGGCGTCTGGGCTCCCAAAGTATCACATCAGGGAAA  
AGM\_cDNA CTCACG AATTTCAATTATTGTACTGGCGTCTGGGCTCCCAAAGTATCACATCAGGGAAA  
Tant\_cDNA CTCACG AATTTCAATTATTGTACTGGCGTCTGGGCTCCCAAAGTATCACATCAGGGAAA  
Patas CTCAAG AATTTCAATTATTGTACTGGCATCCTGGGCTCCCAAAGTATCACATCAGGGAAA  
Colobus CTCAAG AATTTCAATTATTGTACTGGCGTCTGGGCTCCCAAAGTATCACATCAGGGAAA  
DLangur CTCAAG AATTTCAATTATTGTACTGGCGTCTGGGCTCCCAAAGTATCACATCAGGGAAA  
PMarmoset CTTGTG AAAGTCAAGTATTTTTATGGCGTCTGGGCTCCCAAAGTATCACATCAGGGAAA  
Tamarin TCTGTG AAAGTCAACTATTTTTATGGCGTCTGGGCTCCCAAAGTATCACATCAGGGAAA  
Squirrel CTTGTG AAAGTCCAGTATTTTTATGGCGTCTGGGCTCCCAAAGTATCACATCAGGGAAA  
Owl TTTCTG AAAGTCAAGTATTTTTATGGCGTCTGGGCTCCCAAAGTATCACATCAGGGAAA  
Titi TCTGGG AGAGTCAAGTATTTTTATGGCGTCTGGGCTCCCAAAGTATCACATCAGGGAAA  
Saki TTTGGG AAAGTCAAGTATTTTTATGGCGTCTGGGCTCCCAAAGTATCAGATCAGGGAAA  
Howler TCTATG GAAGTCAAGTATTTTTATGGCATCCTGGGCTCCCAAAGTATCACATCAGGGAAA  
Spider TCTGTG AAAGTCAAGTATTTTTATGGCGTCTGGGCTCCCAAAGTATCACATCAGGGAAA  
Woolly TCTGTG AAAGCCAAATATTTTTATGGCGTCTGGGCTCCCAAAGTTTCACATCAGGGAAA

Human CATTACTGGGAGGTAGACGTGTCCAAGAAAAGTGCTTGGATCCTGGGGGTATGTGCTGGC ( 378 )  
Chimp CATTACTGGGAGGTAGACGTGTCCAAGAAAAGTGCTTGGATCCTGGGGGTATGTGCTGGC  
Gorilla CATTACTGGGAGGTAGACGTGTCCAAGAAAAGTGCTTGGATCCTGGGGGTATGTGCTGGC  
Orangutan CATTACTGGGAGGTAGACGTGTCCAAGAAAAGTGCTTGGATCCTGGGGGTATGTGCTGGC  
Gibbon CATTACTGGGAGGTAGACGTGTCCAAGAAAAGTGCTTGGATCCTGGGGGTATGTGCTGGC  
Rhes\_cDNA CATTACTGGGAGGTAGATGTGTCCAAGAAAAGTGCTTGGATCCTGGGGGTATGTGCTGGC  
Baboon CATTACTGGGAGGTAGATGTGTCCAAGAAAAGTGCTTGGATCCTGGGGGTATGTGCTGGC  
AGM CATTACTGGGAGGTAGATGTGTCCAAGAAAAGTGCTTGGATCCTGGGGGTATGTGCTGGC  
AGM\_cDNA CATTACTGGGAGGTAGATGTGTCCAAGAAAAGTGCTTGGATCCTGGGGGTATGTGCTGGC  
Tant\_cDNA CATTACTGGGAGGTAGATGTGTCCAAGAAAAGTGCTTGGATCCTGGGGGTATGTGCTGGC  
Patas CATTACTGGGAGGTAGATGTGTCCAAGAAAAGTGCTTGGATCCTGGGGGTATGTGCTGGC  
Colobus CATTACTGGGAGGTAGATGTGTCCAAGAAAAGTGCTTGGATCCTGGGGGTATGTGCTGGC  
DLangur CATTACTGGGAGGTAGATGTGTCCAAGAAAAGTGCTTGGATCCTGGGGGTATGTGCTGGC  
PMarmoset CATTACTGGGAAGTAGACGTGTCCAATAAAAAGGGATTGGATCCTGGGGGTATGTGGTAGC  
Tamarin CATTACTGGGAGGTAGACGTGTCCAATAAAAAGGGATTGGATCCTGGGGGTATGTGGTAGC  
Squirrel CATTACTGGGAGGTAGACGTGTCCAATAAAAAGGGATTGGATCCTGGGGGTATGTGGTAGC  
Owl CATTACTGGGAGGTAGACGTGTCCAATAAAAAGTGAGTGGATCCTGGGGGTATGTGGTAGC  
Titi CATTACTGGGAGGTAGACGTGTCCAATAAAAAGTGCTTGGATCCTGGGGGTATGTGGTAGC  
Saki CATTACTGGGAGGTAGACGTGTCCAATAAAAAGTGCTTGGATCCTGGGAGTATGTGGTAGC  
Howler CATTACTGGGAGGTAGACGTGTCCAATAAAAAGTGCTTGGATCCTGGGGGTATGTGTCAGC  
Spider CATTACTGGGAGGTAGACGTGTCCGATAAAAAGTGCTTGGATCCTGGGGGTATGTGGTAGC  
Woolly CATTACTGGGAGGTAGACGTGTCCAATAAAAAGTGCTTGGATCCTGGGGGTATGTGGTAGC

|           |                                                               |         |
|-----------|---------------------------------------------------------------|---------|
| Human     | TTCCAACCTGATGCAATG                                            | ( 384 ) |
| Chimp     | TTCCAACCTGATGCAATG                                            |         |
| Gorilla   | TTCCAACCTGATGCAACG                                            |         |
| Orangutan | TTCCAACCTGATGCAATG                                            |         |
| Gibbon    | TTGCAACCTGATGCAATG                                            |         |
| Rhes_cDNA | TTCCAATCCGATGCAATG                                            |         |
| Baboon    | TTCCAACCTGATGCAATG                                            |         |
| AGM       | TTCCAACCCGATGCAACG                                            |         |
| AGM_cDNA  | TTCCAACCCGATGCAACG                                            |         |
| Tant_cDNA | TTCCAACCCGATGCAACG                                            |         |
| Patas     | TTCCAACCCGATGCAATG                                            |         |
| Colobus   | TTCCAACCCGATGCAATG                                            |         |
| DLangur   | TTCCAACCCGATGCAATG                                            |         |
| PMarmoset | TGGAAATGCAATGCAAAA                                            |         |
| Tamarin   | TTTAAATGCAATGCAAAA                                            |         |
| Squirrel  | TTGAAATGTACTGCAAAT                                            |         |
| Owl       | TTGAAGCGCACTGCAAGT                                            |         |
| Titi      | TTGAAATGCGCTGCAAAT                                            |         |
| Saki      | TTGAAATGCACTGCAAAT                                            |         |
| Howler    | TTGAAATGCATTGGAAATTTTCCAGGAATTGAAAATTATCAACCTCAAAAATGGCTACTGG |         |
| Spider    | TTGAAATGCACTGCAAATGTTCCAGGAATTGAAAATTATCAACCTAAAAATGGCTACTGG  |         |
| Woolly    | TTGAAATGCACTGCAAATGTTCCAGGAATTGAAAATTATCAACCTAAAAATGGCTACTGG  |         |

|           |                                                  |              |         |
|-----------|--------------------------------------------------|--------------|---------|
| Human     | -----TGTAAT-----                                 | ATTGAAAAAAT  | ( 390 ) |
| Chimp     | -----TGTAAT-----                                 | ATTGAAAAAAT  |         |
| Gorilla   | -----TGTAAT-----                                 | ATTGAAAAAAT  |         |
| Orangutan | -----TATAAT-----                                 | ATTGAACAAAAT |         |
| Gibbon    | -----TATAAT-----                                 | ATTGAACAAAAT |         |
| Rhes_cDNA | -----TATAAT-----                                 | ATTGAACAAAAT |         |
| Baboon    | -----TATAAT-----                                 | ATTGAACAAAAT |         |
| AGM       | -----TATAAT-----                                 | ATTGAACAAAAT |         |
| AGM_cDNA  | -----TATAAT-----                                 | ATTGAACAAAAT |         |
| Tant_cDNA | -----TATAAT-----                                 | ATTGAACAAAAT |         |
| Patas     | -----TATGAT-----                                 | GTTGAACAAAAT |         |
| Colobus   | -----TATAAT-----                                 | ATTGAACAAAAT |         |
| DLangur   | -----TATAAT-----                                 | ATTGAACAAAAT |         |
| PMarmoset | -----TGGAAT-----                                 | GTTCTAAGACCT |         |
| Tamarin   | -----TGGAAT-----                                 | GTTCTAAGACCT |         |
| Squirrel  | -----CAGAGT-----                                 | GTTTCAGGAAT  |         |
| Owl       | -----TGTAGT-----                                 | GTTCCAAGAATT |         |
| Titi      | -----CGGAAT-----                                 | GGTCCAGGAGTT |         |
| Saki      | -----CGGAAT-----                                 | GGTCCAAGAATT |         |
| Howler    | GTTATAGGGTTACGGAATGCAGATAACTATAGTGCTTTCCAAGATGCA | GTTCCAGAACT  |         |
| Spider    | GTTATAGGGTTACAGAATGCAATAACTATAGTGCTTTCCAGGATGCA  | GTTCCAGGAACT |         |
| Woolly    | GTTATAGGGTTACAGAATGCAGATAACTATAGTGCTTTCCAGGATGCA | GTTCCAGGAACT |         |

|           |                                                                  |         |
|-----------|------------------------------------------------------------------|---------|
| Human     | <u>GAAAATTATCAACCTAAATACGGC</u> -----                            | ( 398 ) |
| Chimp     | GAAAATTATCAACCTAAATATGGC-----                                    |         |
| Gorilla   | GAAAATTATCAACCTAAATATGGC-----                                    |         |
| Orangutan | GAAAATTATCAACCTCAATATGGC-----                                    |         |
| Gibbon    | GAAAATTATCAACCTAAATATGGC-----                                    |         |
| Rhes_cDNA | GAAAATTATCAACCTAAATATGGC-----                                    |         |
| Baboon    | GAAAATTATCAACCTAAATATGGC-----                                    |         |
| AGM       | GAAAATTATCAACCTAAATATGGA-----                                    |         |
| AGM_cDNA  | GAAAATTATCAACCTAAATATGGC-----                                    |         |
| Tant_cDNA | GAAAATTATCAACCTAAATATGGC-----                                    |         |
| Patas     | GAAAATTATCAACCTAAATATGGC-----                                    |         |
| Colobus   | GAAAATTATCAACCTAAATATGGC-----                                    |         |
| DLangur   | GAAAATTATCAACCTAAATATGGC-----                                    |         |
| PMarmoset | GAAAATTATCAACCTAAAAATGGC-----                                    |         |
| Tamarin   | GAAAATTATCAACCTAAAAATGGC-----                                    |         |
| Squirrel  | GAAAATTATCAACCTAAAAATGGC-----                                    |         |
| Owl       | GAAAATGATCAACCTAAAAATGGC-----                                    |         |
| Titi      | GAAAATATCAACCTAAAAATGGC-----                                     |         |
| Saki      | GAAAATTATCAACCTAAAAATGGC-----                                    |         |
| Howler    | GAAAATTATCAACCTAAAAATCGCAACCGG---TTTACAGGGTTACAGAATGCAGATAAATTGT |         |
| Spider    | GAAAATTATCAACCTAAAAATGGCAACCGGAGGAATAAAGGGTTACGGAATGCAGATAACTAT  |         |
| Woolly    | GAAGATTATCAACCTAAAAATGGCTGCTGGAGGAATACAGGGTTACGGAATGCAGATAACTAT  |         |

|           |                                                              |         |
|-----------|--------------------------------------------------------------|---------|
| Human     | <u>-----TACTGG</u>                                           | ( 400 ) |
| Chimp     | -----TACTGG                                                  |         |
| Gorilla   | -----TACTGG                                                  |         |
| Orangutan | -----TACTGG                                                  |         |
| Gibbon    | -----TACTGG                                                  |         |
| Rhes_cDNA | -----TACTGG                                                  |         |
| Baboon    | -----TACTGG                                                  |         |
| AGM       | -----TACTGG                                                  |         |
| AGM_cDNA  | -----TACTGG                                                  |         |
| Tant_cDNA | -----TACTGG                                                  |         |
| Patas     | -----TACTGG                                                  |         |
| Colobus   | -----TACTGG                                                  |         |
| DLangur   | -----TACTGG                                                  |         |
| PMarmoset | -----TACTGG                                                  |         |
| Tamarin   | -----TACTGG                                                  |         |
| Squirrel  | -----TACTGG                                                  |         |
| Owl       | -----TACTGG                                                  |         |
| Titi      | -----TACTGG                                                  |         |
| Saki      | -----TACTGG                                                  |         |
| Howler    | AGTGCTTTCCAGAATGCATTTCCAGGAATTCAAAGTTATCAACCTAAAAAGAGCCACTTG |         |
| Spider    | AGTGCTTTCCGGGATACATTT-----CAACCTATAAATGACTCCTGG              |         |
| Woolly    | AGTGCTTTCCAGGATGTATTT-----CAACCTAAAAATGACTACTGG              |         |

|           |                                         |         |
|-----------|-----------------------------------------|---------|
| Human     | GTTATAGGGTTA-----GAGGAAGGAGTTAAATGTAGT  | ( 411 ) |
| Chimp     | GTTATAGGGTTA-----GAGGAAGGAGTTAAATGTAGT  |         |
| Gorilla   | GTTATAGGGTTA-----GAGGAAGGAGTTAAATGCAGT  |         |
| Orangutan | GTTATAGGGTTA-----GAGGAAGGAGTTAAATGTAGT  |         |
| Gibbon    | GTTATAGGGTTA-----GAGGAAGGAGTTAAATGTAAT  |         |
| Rhes_cDNA | GTTATAGGGTTA-----CAGGAAGGAGTTAAATATAGT  |         |
| Baboon    | GTTATAGGGTTA-----CAGGAAGGAGTTAAATATAGT  |         |
| AGM       | GTTATAGGGTTA-----CAGGAAGGAGATAAATATAGT  |         |
| AGM_cDNA  | GTTATAGGGTTA-----CAGGAAGGAGATAAATATAGT  |         |
| Tant_cDNA | GTTATAGGGTTA-----CAGGAAGGAGATAAATATAGT  |         |
| Patas     | GTTATAGGGTTA-----CAGGAAGGAGTAAATATAGT   |         |
| Colobus   | GTTATAGGGTTA-----CAGGAAGGAGTTAAATATAGT  |         |
| DLangur   | GTTATAGGGTTA-----CAGGAAGGAGTTAAATATAAT  |         |
| PMarmoset | GTTATAGGGTTACGGAATACAGATAACTATAGTGCTTTC |         |
| Tamarin   | GTTATAGGGTTACAGAATACAAATAACTATAGTGCTTTC |         |
| Squirrel  | GTTATAGGGTTACGGAATGCAGGTAACATAGGGCTTTC  |         |
| Owl       | GTTATAGGGTTACGGAATGCAGATAACTATAGTGCTTTC |         |
| Titi      | GTGATAGGGTTACGGAATGCAGATAACTATAGTGCTTTC |         |
| Saki      | GTTATAGGGTTATGGAATGCAGGTAACATAGTGCTTTC  |         |
| Howler    | TTTACAGGGTTACAGAATCTAAGTAACATAATGCTTTC  |         |
| Spider    | GTTACAGGGTTACGGAATGTAGATAACTATAATGCTTTC |         |
| Woolly    | GTTACAGGGTTATGGAACGCAGATAACTATAATGCTTTC |         |

|           |                               |                 |                          |         |
|-----------|-------------------------------|-----------------|--------------------------|---------|
| Human     | -----GCTTTCCAGGATAGTTCCTTTC   | CATACTCCTTCTGTT | CCTTTTCATTGTGCCCTC       | ( 429 ) |
| Chimp     | -----GCTTTCCAGGATGGTTCCTTTC   | CATACTCCTTCTGCT | CCTTTTCATTGTGCCCTC       |         |
| Orangutan | -----GCTTTCCAGGATGGTTCCTTTC   | CATACTCCTTCTGCT | CCTTTTCATTGTGCCCTC       |         |
| Gibbon    | -----GCTTTCCAGGATGGTTCCTTTC   | CATACTCCTTCTGCT | CCTTTTCATTGTGCCCTC       |         |
| Rhes_cDNA | -----GTTTTCCAGGATGGTTCCTTTC   | CATACTCCTTTT    | GCTCCTTTTCATTGTGCCCTC    |         |
| Baboon    | -----GTTTTCCAGGATGGTTCCTTTC   | CATACTCCTTTT    | GCTCCTTTTCATTGTGCCCTC    |         |
| AGM       | -----GTTTTCCAGGATAGTTCCTTTC   | CATACTCCTTTT    | GCTCCTTTTCATTGTGCCCTC    |         |
| AGM_cDNA  | -----GTTTTCCAGGATGGTTCCTTTC   | CATACTCCTTTT    | GCTCCTTTTCATTGTGCCCTC    |         |
| Tant_cDNA | -----GTTTTCCAGGATGGTTCCTTTC   | CATACTCCTTTT    | GCTCCTTTTCATTGTGCCCTC    |         |
| Patas     | -----GTTTTCCAGGATGGTTCCTTTC   | CATACTCCTTTT    | GCTCCTTTTCATTGTGCCCTC    |         |
| Colobus   | -----GTTTTCCAGGATGGTTCCTTTC   | CATACTCCTTTT    | GCTCCTTTTCATTGTGCCCTC    |         |
| DLangur   | -----GTTTTCCAGGATGGTTCCTTTC   | CATACTCCTTTT    | GCTCCTTTTCATTGTGCCCTC    |         |
| PMarmoset | -----GATGTCCAGGATGGTTCCTTTC   | CGCTCTGTTTCTTCT | GGTTCCTTTGATCGTGCCCTC    |         |
| Tamarin   | -----GATTTCCAGATTGGTTCCTTTC   | CGCTCTACTGCTTCT | GTTTCCTTTGATCGTGCCCTC    |         |
| Squirrel  | -----GATTTCCCTGGCTGGTTCCTTTC  | CGCTTACTCCTTCT  | CCTTTTTCCTTTGATCGTGCCCTC |         |
| Owl       | -----GATTTCCAGGATGGTTCCTTTC   | CGCTTACTCCTTCT  | GCTCCTTTGATCGTGCCCTC     |         |
| Titi      | -----GATTTCCAGGATGGTTCCTTTC   | CGCTTACTTATGCT  | CCTTTGATCGTGCCCTC        |         |
| Saki      | -----GATTTCCAGGATGGTTCCTTTC   | CGCTTACTTATGGT  | CCTTTGATCGTGCCCTC        |         |
| Howler    | TATATTGATTTTCAGGATGATTCCCTTTC | TACTCCTTCTGCT   | CCTTTGATCGTACCCCTC       |         |
| Spider    | -----GATTTCCAGGATGGTTCCTTTC   | CGCTTACTCCTTCT  | GCTCCTTTGATGGTGCCCTC     |         |
| Woolly    | -----GATTTCCAGGATGGTTCCTTTC   | CGCTTACTCCTTTT  | GCTCCTTTGATTGTGCCCTC     |         |

Human TCTGTGATTATTTGTCCTGATCGTGTTGGAGTTTTCTAGACTATGAGGCTTGCACTGTC ( 449 )  
Chimp TCTGTGATTATTTGTCCTGATCGTGTTGGAGTTTTCTAGACTATGAGGCTTGCACTGTC  
Gorilla TCTGTGATTATTTGTCCTGATCGTGTTGGAGTTTTCTAGACTATGAGGCTTGCACTGTC  
Orangutan TCTGTGATTATTTGTCCTGATCGTGTTGGAGTTTTCTAGACTATGAGGCTTGCACTGTC  
Gibbon TCTGTGAATATTTGTCCTGATCGTGTTGGAGTTTTCTAGACTATGAGGCTTGCACTGTC  
Rhes\_cDNA TCTGTGATTATTTGTCCTGATCGTGTTGGAGTTTTCTAGACTATGAGGCTTGCACTGTC  
Baboon TCTGTGATTATTTGTCCTGATCGTGTTGGAGTTTTCTAGACTATGAGGCTTGCACTGTC  
AGM TCTGTGATTATTTGTCCTGATCGTGTTGGAGTTTTCTAGACTATGAGGCTTGCACTGTC  
AGM\_cDNA TCTGTGATTATTTGTCCTGATCGTGTTGGAGTTTTCTAGACTATGAGGCTTGCACTGTC  
Tant\_cDNA TCTGTGATTATTTGTCCTGATCGTGTTGGAGTTTTCTAGACTATGAGGCTTGCACTGTC  
Patas TCTGTGATTTTTGTCCTGATCGTGTTGGAGTTTTCTAGACTATGAGGCTTGCACTGTC  
Colobus TCTGTGATCATTGTCCTGATCGTGTTGGAGTTTTCTAGACTATGAGGCTTGCACTGTC  
DLangur TCTGTGATTATTTGTCCTGATCGTGTTGGAGTTTTCTAGACTATGAGGCTTGCACTGTC  
PMarmoset TTTATGACTATTTGTCCTAATCGTGTTGGAGTTTTCTAGACTATGAGGCTTGCACTATC  
Tamarin TTTATGACTATTTATCCTAATCGTGTTGGAGTTTTCTAGACTATGAGGCTTGCACTGTC  
Squirrel TTTATGACTATTTGTCCTAATCGGGTCGGAGTTTTCTAGACTATGAGGCTCGCACTATC  
Owl TTTATGACTATTTGTCCTAATCGTGTTGGAGTTTTCTAGACTATGAGGCTTGCACTGTC  
Titi TTTATGACTATTTGTCCTAATCGTGTTGGAGTTTTCTAGACTATGAGGCTTGCACTGTC  
Saki TTTATGACTATTTGTCCTAATCGTGTTGGAGTTTTCTAGACTATGAGGCTTGCACTGTC  
Howler TTTATGACTATTTGTCCTAAACGTGTTGGAGTTTTCTAGACTATGAGGCTTGCACTGTC  
Spider TTTATGACTATTTGTCCTAAACGTGTTGGAGTTTTCTAGACTGTAAGGCTTGCACTGTC  
Woolly TTTATGACTATTCGTCCTAAACGTGTTGGCGTTTTCTAGACTATGAGGCTTGCACTGTC

Human TCATTCTTCAATATCACAAACCATGGATTTCTCATCTATAAGTTTTCTCACTGTTCTTTT ( 469 )  
Chimp TCATTCTTCAATATCACAAACCATGGATTTCTCATCTATAAGTTTTCTCACTGTTCTTTT  
Gorilla TCATTCTTCAATATCACAAACCATGGATTTCTCATCTATAAGTTTTCTCACTGTTCTTTT  
Orangutan TCATTCTTCAATATCACAAACCATGGATTTCTCATCTATAAGTTTTCTCACTGTTCTTTT  
Gibbon TCATTCTTCAATATCACAGACCATGGATTTCTCATCTATAAGTTTTCTCACTGTTCTTTT  
Rhes\_cDNA TCATTCTTCAATATCACAAACCATGGATTTCTCATCTATAAGTTTTCTCAGTGTTCTTTT  
Baboon TCATTCTTCAATATCACAAACCATGGATTTCTCATCTATAAGTTTTCTCAGTGTTCTTTT  
AGM TCATTCTTCAATATCACAAACCATGGATTTCTCATCTATAAGTTTTCTCAGTGTTCTTTT  
AGM\_cDNA TCATTCTTCAATATCACAAACCATGGATTTCTCATCTATAAGTTTTCTCAGTGTTCTTTT  
Tant\_cDNA TCATTCTTCAATATCACAAACCATGGATTTCTCATCTATAAGTTTTCTCAGTGTTCTTTT  
Patas TCATTCTTCAATATCACAAACCATGGATTTCTCATCTATAAGTTTTCTCAGTGTTCTTTT  
Colobus TCATTCTTCAATATCACAAACCATGGATTTCTCATCTATAAGTTTTCTCAGTGTTCTTTT  
DLangur TCATTCTTCAATATCACAAACCATGGATTTCTCATCTATAAGTTTTCTCAGTGTTCTTTT  
PMarmoset TCATTCTTCAATGTCACAAGCAATGGATTTCTCATCTATAAGTTTTCTAACTGTCATTTT  
Tamarin TCATTCTTCAATGTCACAAGCAATGGATTTCTCATCTATAAGTTTTCTAACTGTCATTTT  
Squirrel TCATTCTTCAATGTCACAAGCAATGGATTTCTCATCTATAAGTTTTCTGACTGTCATTTT  
Owl TCATTCTTCAATGTCACAAGCAATGGATTTCTCATCTATAAGTTTTCTAACTGTCATTTT  
Titi TCATTCTTCAATGTCACAAGCAATGGATTTCTCATCTATAAGTTTTCTAACTGTCATTTT  
Saki TCATTCTTCAATGTCACAAGCAATGGATTTCTCATCTATAAGTTTTCTAACTGTCGTTTTT  
Howler TCATTCTTCAATGTCACAAGCAATGGATATCTCATCTATAAGTTTTCTAACTGTCAGTTT  
Spider TCATTCTTCAATGTCACAAGCAATGGATGTCCTCATCTATAAGTTTTCTAAGTGTGTCATTTT  
Woolly TCATTCTTCAATGTCACAAGCAATGGATGTCCTCATCTATAAGTTTTCTAACTGTCATTTT

|           |                                                                             |
|-----------|-----------------------------------------------------------------------------|
| Human     | <u>TCTCAGCCTGTATTTCCATATTTAAATCCTAGAAAATGTGGAGTCCCCATGACTCTGTGC</u> ( 489 ) |
| Chimp     | TCTCAGCCTGTATTTCCATATTTAAATCCTAGAAAATGTGGAGTCCCCATGACTCTGTGC                |
| Gorilla   | TCTCAGCCTGTATTTCCATATTTAAATCCTAGAAAATGTAGAGTCCCCATGACTCTGTGC                |
| Orangutan | TCTCAGCCTGTATTTCCATATTTAAATCCTAGAAAATGTAGAGTCCCCATGACTCTGTGC                |
| Gibbon    | TCTCAGCCTGTATTTCCATATTTAAATCCTAGAAAATGTACAGTCCCCATGACTCTGTGC                |
| Rhes_cDNA | TCTAAGCCTGTATTTCCATATTTAAATCCAGAAAATGTACAGTCCCCATGACTCTGTGC                 |
| Baboon    | TCTAAGCCTGTATTTCCATATTTAAATCCAGAAAATGTACAGTCCCCATGACTCTGTGC                 |
| AGM       | TCTAAGCCTGTATTTCCATATTTAAATCCAGAAAATGTACAGTCCCCATGACTCTGTGC                 |
| AGM_cDNA  | TCTAAGCCTGTATTTCCATATTTAAATCCAGAAAATGTACAGTCCCCATGACTCTGTGC                 |
| Tant_cDNA | TCTAAGCCTGTATTTCCATATTTAAATCCAGAAAATGTACAGTCCCCATGACTCTGTGC                 |
| Patas     | TCTAAGCCTGTATTTCCATATTTAAATCCAGAAAATGTACAGTCCCCATGACTCTGTGC                 |
| Colobus   | TCTAAGCCTGTATTTCCATATTTAAATCCTAGAAAATGTACAGTCCCCATGACTCTGTGC                |
| DLangur   | TCTAAGCCTGTATTTCCATATTTAAATCCTAGAAAATGTACAGTCCCCATGACTCTGTGC                |
| PMarmoset | TCTTATCCTGTATTTCCATATTTCAATCCTAGAAAATGTGAATTACCCATGACTCTGTGC                |
| Tamarin   | TCTTATCCTGTATTTCCATATTTCAATCCTAGAAAATGTGAATTACCCATGACTCTGTGC                |
| Squirrel  | TCTTATCCTGTATTTCCATATTTCAATCCTAGAAAATGTGAATTACCCATGACTCTGTGC                |
| Owl       | TGTTATCCTGTATTTCCATATTTCAATCCTAGAAAATGTGAATTACCCATGACTCTGTGC                |
| Titi      | TCTTATCCTGTATTTCCATATTTCAATCCTAGAAAATGTGAATTACCCATGACTCTGTGC                |
| Saki      | TCTGATCCTGTATTTCCATATTTCAATCCTAGAAAATGTGAATTACCCATGACTCTGTGC                |
| Howler    | TCTTATCCTGTATTTCCATATTTCAATCCTAGAAAATGTGAATTACCCATGACTCTGTGC                |
| Spider    | TCTTATCCTGTATTTCCATATTTCAATCCTAGAAAATGTAAATTACCCATGACTCTGTGC                |
| Woolly    | TCTTGTCCGTATTTCCATATTTCAATCCTAGAAAATGTAAATTACCCATGACTCTGTGC                 |

|           |                                |
|-----------|--------------------------------|
| Human     | <u>TCACCAAGCTCTTGA</u> ( 493 ) |
| Chimp     | TCACCAAGCTCTTGA                |
| Gorilla   | TCGCAAGCTCTTGA                 |
| Orangutan | TCACCAAGCTCTTGA                |
| Gibbon    | TCACCAAGCTCTTGA                |
| Rhes_cDNA | TCACCAAGCTCTTGA                |
| Baboon    | TCACCAAGCTCTTGA                |
| AGM       | TCACCAAGCTCTTGA                |
| AGM_cDNA  | TCACCAAGCTCTTGA                |
| Tant_cDNA | TCACCAAGCTCTTGA                |
| Patas     | TCACCAAGCTCTTGA                |
| Colobus   | TCACCAAGCTCTTGA                |
| DLangur   | TCACCAAGCTCTTGA                |
| PMarmoset | TCACCAAGCTCTTGA                |
| Tamarin   | TCACCAAGCTCTTGA                |
| Squirrel  | TCACCAAGCTCTTGA                |
| Owl       | TCACCAAGCTCTTGA                |
| Titi      | TCACCAAGCTCTTGA                |
| Saki      | TCACCAAGATCTTGA                |
| Howler    | TCACCAAGCTCTTGA                |
| Spider    | TCACCAAGCTCTTGA                |
| Woolly    | TCACCAAGCTCTTGA                |
