# Supplementary material
Source: PubMed Central journal article supplement (PMC549489)

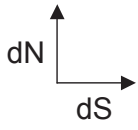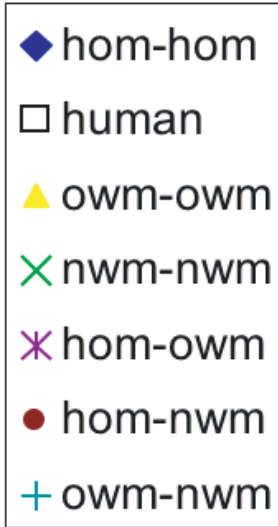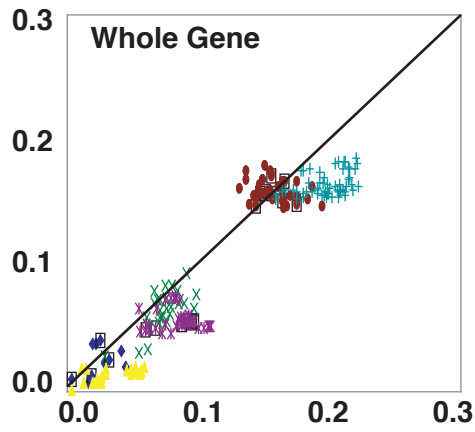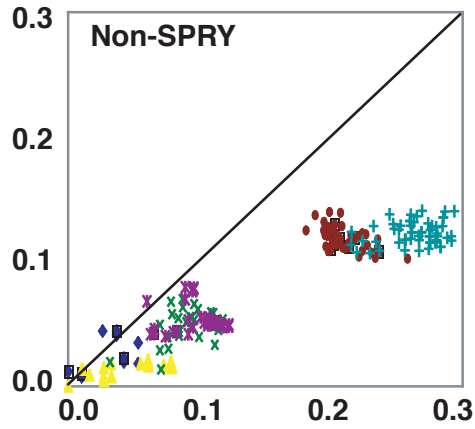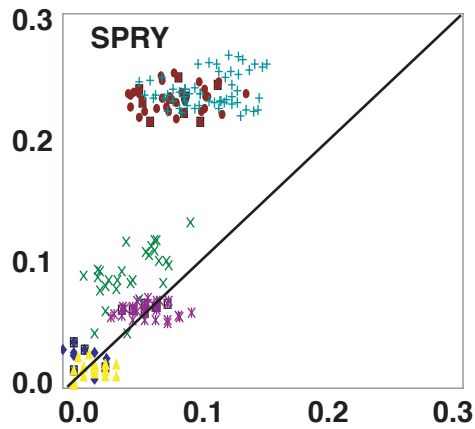

Supplement: pnas_102_8_2832__3.pdf [file pnas_102_8_2832__3.pdf]
